1       **Changes in excitability and ion channel expression in neurons of the major**  
2                                   **pelvic ganglion in female type II diabetic mice**

3  
4  
5       Michael Gray<sup>1\*</sup>, Kawasi M. Lett<sup>1\*</sup>, Virginia B. Garcia<sup>1</sup>, Cindy Kyi<sup>1</sup>, Kathleen A. Pennington<sup>2</sup>, Laura C.  
6                                   Schulz<sup>2</sup>, David J. Schulz<sup>1</sup>

7  
8                   <sup>1</sup> *Division of Biological Sciences, University of Missouri, Columbia, MO USA 65211*

9                   <sup>2</sup> *Department of Obstetrics, Gynecology and Women's Health, University of Missouri, Columbia, MO,*  
10                                   *65211, USA.*

11                                   \* *Denotes equal contribution by these authors*

12  
13  
14  
15       **Abbreviated Title**

16       Changes in parasympathetic neurons in Type II diabetes

17  
18       **Corresponding Author**

19       David J. Schulz, Ph.D.  
20       Division of Biological Sciences  
21       University of Missouri-Columbia  
22       218 LeFevre Hall  
23       Columbia, MO 65211  
24       Ph 573-882-4067  
25       Fax 573-884-5020  
26       Email: [schulzd@missouri.edu](mailto:schulzd@missouri.edu)

27  
28  
29       **Acknowledgments**

30       This work was funded by a grant from the Missouri Spinal Cord Injuries Research Program (D.J.S.), the  
31       Craig H. Neilsen Foundation (D.J.S.), American Diabetes Association Grant 1-14-BS-181 (L.C.S.) and  
32       American Heart Association Postdoctoral Fellowship 13POST16910108 (K.A.P.). The authors declare no  
33       competing financial interests.

34 **ABSTRACT**

35 Bladder cystopathy is a common urological complication of diabetes, and has been associated  
36 with changes in parasympathetic ganglionic transmission and some measures of neuronal excitability in  
37 male mice. To determine whether type II diabetes also impacts excitability of parasympathetic ganglionic  
38 neurons in females, we investigated neuronal excitability and firing properties, as well as underlying ion  
39 channel expression, in major pelvic ganglion (MPG) neurons in control, 10-week, and 21-week db/db  
40 mice. Type II diabetes in *Lepr<sup>db/db</sup>* animals caused a non-linear change in excitability and firing properties  
41 of MPG neurons. At 10 weeks, cells exhibited increased excitability as demonstrated by an increased  
42 likelihood of firing multiple spikes upon depolarization, decreased rebound spike latency, and overall  
43 narrower action potential half-widths as a result of increased depolarization and repolarization slopes.  
44 Conversely, at 21 weeks MPG neurons of db/db mice reversed these changes, with spiking patterns and  
45 action-potential properties largely returning to control levels. These changes are associated with  
46 numerous time-specific changes in calcium, sodium, and potassium channel subunit mRNA levels.  
47 However, Principal Components Analysis of channel expression patterns revealed that the rectification of  
48 excitability is not simply a return to control levels, but rather a distinct ion channel expression profile in  
49 21-week db/db neurons. These data indicate that type II diabetes can impact the excitability of post-  
50 ganglionic, parasympathetic bladder-innervating neurons of female mice, and suggest that the non-linear  
51 progression of these properties with diabetes may be the result of compensatory changes in channel  
52 expression that act to rectify disrupted firing patterns of db/db MPG neurons.

53

54 **Keywords: type II diabetes, diabetic cystopathy, autonomic ganglia, parasympathetic neurons,**  
55 **excitability, electrophysiology**

56

57

## 58 INTRODUCTION

59 Diabetes is a systemic, progressive disease characterized by lack of insulin directly (Type I), or  
60 functional lack of its effectors and/or insulin resistance (Type II), that ultimately leads to hyperglycemia  
61 and chronic complications. Diabetes is the seventh leading cause of death in the United States and afflicts  
62 11.1-11.9% of adults over the age of 20; this rate has increased from 8.9% in years 1988-1994 to 11.9 %  
63 in years 2011-2014 (United States. Department of Health and Human Services. et al. 2016). In addition,  
64 diabetic complications are age dependent (Gunnarsson 1975; DCCT Research Group 1996; Liu et al.  
65 2017). This age dependence combined with the 111.5% increase in persons age 65 and older from 1975-  
66 2015 (United States. Department of Health and Human Services. et al. 2016), necessitates studying an  
67 important complication of diabetes—diabetic neuropathy (DN).

68 Diabetic neuropathy is particularly dangerous due to its insidious development, susceptibility of  
69 autonomic neurons and their subsequent regulation of vital organ systems, and a potential for positive  
70 feedback loops through dysregulation of microvasculature (Faerman et al. 1971; Vinik et al. 2003).  
71 Interventions are difficult as symptoms are subclinical and are often undiagnosed until long after neural  
72 lesions occur. That is, autonomic motor neuron damage occurs long patients report somatic sensory  
73 symptoms. This is supported by the finding that in diabetic mice, thin, non-myelinated post ganglionic  
74 autonomic motor neurons show deficits long before somatic sensory motoneurons do (Liu et al. 2017).  
75 Neuropathic lesions can affect various autonomic pathways resulting in gastroparesis (Vinik et al. 2003),  
76 cardiovascular dysregulation (Vinik et al. 2003, 2011), sudomotor dysfunction (Liu et al. 2017), diabetic  
77 cystopathy (Faerman et al. 1971; Frimodt-Moller 1980; Kaplan et al. 1995; Vinik et al. 2003), and  
78 dysregulation of blood flow in the periphery (UKPDS 1998). Bladder dysfunction as a result of diabetes  
79 (i.e. diabetic cystopathy) is characterized by reduced bladder sensation, increased post-residual void  
80 volume and overactive bladder (Kaplan et al. 1995; Yuan et al. 2015), and was first formally described in  
81 diabetics in 1864 (Faerman et al. 1971). Some of the effects of diabetic cystopathy can be attributed to  
82 damaged bladder afferents. For example, it has been shown in streptozocin (STZ) treated rats (type I

83 diabetes model) that diabetic cystopathy is correlated with reduced levels of nerve growth factor (NGF) in  
84 dorsal root ganglion neurons (Sasaki et al. 2002). Furthermore, when NGF is expressed at the bladder  
85 wall, the development of diabetic cystopathy and subsequent increased post residual void volume can be  
86 mitigated (Sasaki et al. 2004). However, little is known as to how diabetes impacts autonomic neurons  
87 innervating the bladder, and how this contributes to autonomic neuropathy and bladder cystopathy.

88         The major pelvic ganglion (MPG) of the mouse is the primary motor innervation of the urinary  
89 bladder. When examining motor neurons of this network in males, Tompkins et al. (2013), found that in  
90 post-ganglionic, parasympathetic, MPG neurons in *Lepr<sup>db/db</sup>* mice had an enhanced number of excitatory  
91 post-synaptic potentials (EPSP) up to 20 seconds after pelvic nerve stimulation relative to control.  
92 Simultaneously, the authors observed no change in EPSP amplitude. However, STZ-treated mice did not  
93 differ in EPSP number and had significantly reduced amplitudes relative to control mice. This suggests  
94 that the type I and type II models are distinct in how they affect physiology of MPG neurons.  
95 Furthermore, change in action potential properties is similarly dependent on diabetic type: after-  
96 hyperpolarization (AHP) duration was significantly decreased in *Lepr<sup>db/db</sup>* mice, while being significantly  
97 increased in STZ mice (Tompkins et al. 2013). Finally, MPG neuron input resistance and resting  
98 membrane potential are decreased and depolarized, respectively, in *Lepr<sup>db/db</sup>* mice but unaffected in STZ  
99 mice (Tompkins et al. 2013). These results suggest that both EPSP and intrinsic properties of MPG  
100 neurons are differentially modulated by the nature of the diabetic model.

101         In this study, we exploit the *Lepr<sup>db/db</sup>* C57BL/6J mouse, to extend our understanding of how type  
102 II diabetes affects progression of changes in neuronal excitability in neurons of the MPG of female mice.  
103 Specifically, we examine how these conditions change neurons at 10- and 21-week time points by  
104 combining current clamp recordings of neuronal output with ion channel expression analyses in the  
105 MPGs of female mice. We predicted that firing properties and intrinsic properties should resemble that  
106 observed by Tompkins et al. (2013); with a general increase in excitability at week 21 to evoked firing  
107 rate, an increased RMP, decreased input resistance, and increased AHP duration. However, we observed a

108 distinct effect: excitability of MPG neurons was initially increased at 10-weeks, but subsequently became  
109 less excitable again – towards baseline levels – at 21-weeks. These results suggest a compensatory change  
110 in MPG neurons in diabetic animals. We then went on to investigate potential underlying mechanisms for  
111 these changes via measurements of ion channel mRNA levels in MPGs from 10-week and 21-week  
112 diabetic females.

113

## 114 **METHODS**

### 115 *Type II Diabetes Model – Lepr<sup>db/db</sup> Animals*

116 Wild type (WT) C57BL/6J and Lepr<sup>db/db</sup> female mice (*Mus musculus*) were obtained from the  
117 Jackson Laboratory (Bar Harbor, ME, USA). Lepr<sup>db/db</sup> mice have a mutation that interrupts the longest  
118 isoform of the leptin receptor (Chen et al. 1996). These animals display hyperphagia, obesity,  
119 hyperglycemia and hyperinsulinemia, which has led to their widespread use as a model of type II  
120 diabetes. Together, mouse and rat leptin mutants have been used in over 4000 published studies of type II  
121 diabetes (Wang et al. 2014). Lepr<sup>db/db</sup> mice have been used by the Animal Models of Diabetic  
122 Complications Consortium and others as models for diabetic neuropathy (Sullivan et al. 2007).

123 Mice were group housed in cages on a 12 hr. light/dark cycle and fed a standard chow diet ad  
124 libitum. All animal procedures were performed in accordance with National Institutes of Health Guide for  
125 the Care and Use of Laboratory Animals and approved by the University of Missouri Animal Care and  
126 Use Committee.

127

### 128 *Establishing a Diabetic Phenotype*

129 *Glucose Measurement.* At either 10 (n = 15 WT and 14 Lepr<sup>db/db</sup>) or 21 (n = 6 WT and 14  
130 Lepr<sup>db/db</sup>) weeks of age animals were fasted for 4 hours and then a fasting glucose measurement was taken

131 via tail blood using the average of two readings of a OneTouch® (Sunnyvale, CA) or ReliOn Prime®  
132 (Arkay inc., Kyoto, Japan; Distributed by Walmart, Bentonville, AR) Blood Glucose Monitoring System.  
133 At this time blood was collected to measure fasting serum insulin levels. Weights were also recorded at  
134 this time.

135 *Insulin Elisa.* Serum insulin levels were analyzed using a Mouse/Rat Insulin Elisa (Millipore™,  
136 Billerica, MA) according to manufacturer's instructions. A total number of 6 samples at 10 weeks were  
137 run for both WT and *Lepr<sup>db/db</sup>* females. At 21 weeks of age 9 *Lepr<sup>db/db</sup>* and 6 WT females were analyzed.  
138 For *Lepr<sup>db/db</sup>* serum was diluted at 1:20 with matrix solution provided in the ELSIA kit to allow for  
139 measurements to fall on the standard curve.

140

#### 141 *Electrophysiology*

142 MPGs were dissected from isoflurane euthanized female mice from wildtypes (n = 9) at 10 weeks  
143 (WT), *Lepr<sup>db/db</sup>* at 10 weeks (n = 5; DB10), or *Lepr<sup>db/db</sup>* at 21 weeks (n = 5; DB21). Dissection and all  
144 experiments were done in oxygenated physiological saline at room temperature. MPGs were dissected out  
145 and pinned to a Sylgard (Dow, Midland, MI) lined perfusion chamber. The preparation was then  
146 desheathed using small pins to remove excess tissue. Saline was composed of in mM: NaCl, 146; KCl,  
147 4.7; MgSO<sub>4</sub>, 0.6; NaHCO<sub>3</sub>, 1.6; NaH<sub>2</sub>PO<sub>4</sub>, 0.13; CaCl<sub>2</sub>, 2.5; Glucose, 7.8; HEPES, 20; pH'd to 7.3.  
148 Electrodes were pulled on a P-97 microelectrode puller (Sutter, Novato, CA) filled with 3M KCl, and had  
149 resistances of 30 to 60 MΩ. Recordings were acquired in Bridge mode using an Axoclamp 900A and  
150 digitized using a Digidata 1440A using the pClamp 10.3 suite of software (Molecular Devices,  
151 Sunnyvale, Ca) running on an IBM-compatible computer. Silver electrode and ground wire were  
152 chlorided using household Bleach (Clorox, Oakland, CA).

153

154 *Passive properties.* Resistance, time constant, capacitance and rebound spikes were estimated  
155 from -500 pA current injections of 400 ms. In some protocols where there were no rebound spikes, these  
156 properties were estimated from -500 pA current injections for 2000 ms, To ensure these protocols did not  
157 differ, we examined action potential properties for 12 WT neurons where both protocols were used. A  
158 paired t-test showed that hyperpolarization duration did not significantly affect these measurements, the  
159 closest measurement to being affected was AHP ( $t(11) = 2.090$ ,  $p = 0.061$ ) while all other properties were  
160 unaffected ( $p > 0.1$ ). Due to the contamination of slow activating currents and membranes being non-  
161 isopotential in real neurons, time was estimated by the 2 exponential fit;  $V_m(t) = V_{final} + A_1 e^{-t/\tau_1} +$   
162  $A_2 e^{-t/\tau_2}$ ; the larger A (IR) and time constant term were taken to be the time constant (Golowasch et al.  
163 2009; White and Hooper 2013). Capacitance was estimated from this time constant and input resistance.  
164 For excitability data, current was injected from 0 to 700 pA in 50 pA steps for 400 ms.

165 *Action Potential Properties.* Action potential properties were estimated both manually (Spike  
166 count, Rheobase, AP slope to depolarizing current injection, and Threshold) and by using the auto-  
167 statistics package of the Clampfit program from the pClamp 10.3 suite of software (Molecular Devices,  
168 Sunnyvale, Ca) (All others). These properties are illustrated in figure 1 for reference, and unless otherwise  
169 stated were performed on rebound spikes to prevent contamination from current injection.

170 *Threshold measurement.* Threshold was measured from two methods and verified by estimation  
171 from passive properties and rheobase. First, we extrapolated manually from step protocols. Second, we  
172 adopted an adapted version of the spike slope method, where the derivative of voltage with respect to time  
173 slope is plotted vs voltage and the voltage at which this slope meets or exceeds some slope is threshold  
174 usually set from 2 to 20 mV/ms (Naundorf et al. 2006; Platkiewicz and Brette 2010, 2011). However,  
175 rather than using constant ascending spike slope, this method was adapted by measuring maximal  
176 ascending slope within a 0.5 ms bin, defining threshold as the voltage recorded 0.25 ms before the center  
177 point of the half maximal bin. Within wildtype, no significant differences were found between this

178 method ( $M = -23.5$ ,  $SD = 8.1$ ) and manual estimation ( $M = -23.5$ ,  $SD = 8.1$ ). Slope method was chosen to  
179 minimize any confounds between changes in ascending slope.

180 *Inclusion Criterion.* Some neurons impaled produced no spikes. As we could not ascertain  
181 whether this was due to impalement damage, or these cells being silent neurons or closely apposed  
182 satellite glial cells (Hanani 2010), the following inclusion criteria were made: 1) All neurons must  
183 produce spikes to depolarizing current injections. 2) All cells must have resting membrane potentials less  
184 than  $-30$  mV. 3) All cells must have input resistances greater than  $\sim 18$  M $\Omega$ .

185 *Statistics.* Data was organized and stored in Microsoft Excel (Microsoft, Redmond, WA). All  
186 Statistics and graphs were made in Sigmaplot 11.0 (Chicago, Il), R (<https://www.r-project.org/>) and  
187 formatted in Adobe Illustrator CC 2017 (San Jose, CA). Data that passed normality and was  
188 homoscedastic used one way ANOVA. Most Data, however, was found to be non-normal and /or fail  
189 equal variance and comparisons were therefore made with a non-parametric Kruskal-Wallis one-way  
190 ANOVA on ranks using a post-hoc Dunn's test. The two-way ANOVA for Figure 3B failed the  
191 assumptions of normality and homoscedasticity and could not be successfully transformed, statistics are  
192 reported for raw data.

193

#### 194 *qRT-PCR Methods*

195 Paired MPGs from each animal were collected into Trizol reagent (Life Technologies, Carlsbad,  
196 CA), homogenized, and stored at  $-80^{\circ}\text{C}$  until RNA extraction. Total RNA was isolated from MPGs  
197 according to the protocol provided by the manufacturer. Complementary DNA (cDNA) was generated  
198 from 100 ng total RNA primed by a mixture of random hexamers and oligo-dT primers. Reverse  
199 transcription reactions were carried out at a volume of 20  $\mu\text{l}$  using qScript cDNA SuperMix (QuantaBio,  
200 Beverly, MA) according to manufacturer protocols. Following cDNA synthesis, the reaction was heat  
201 inactivated and diluted 5X to a final volume of 100  $\mu\text{l}$  before being used as a template for quantitative



202 PCR (qPCR). From each cDNA reaction we quantified at least 15 different gene products. Multiple  
203 cDNA synthesis reactions were carried out from a single total RNA sample to quantify the full suite of  
204 genes examined in this study.

205 In our previous work, we designed or modified and independently validated qPCR primers for  
206 use in absolute quantitation of mRNA copy number for all of the genes of interest in this study. These  
207 primer sets are previously published, and standard curves generated and used as described in our previous  
208 work (Garcia et al. 2014, 2018). Briefly, qPCR reactions were carried out using SYBR mastermix  
209 (BioRad) according to the manufacturer's instructions, and consisted of primers at final concentrations of  
210 2.5  $\mu$ M. Reactions were carried out on a CFXConnect (BioRad) machine with a three-step cycle of 95°C-  
211 15s, 58°C-20s, 72°C-20s, followed by a melt curve from 65°C to 95°C. Fluorescence data acquisition was  
212 made at the 72°C step, and every 0.5°C of the melt curve. All reactions were run in triplicate, and the  
213 average Ct (cycle threshold) was used for interpolation with standard curves to generate copy number for  
214 a given reaction.

215 The unit we use to express all of the qPCR data in this study is “copy number per ng of total  
216 RNA,” and reflects the amount of input RNA that went into the cDNA synthesis reaction. All of the data  
217 were normalized (see Garcia et al. 2014) relative to the average expression of Glyceraldehyde 3-  
218 phosphate dehydrogenase (GAPDH), beta-actin, and hypoxanthine guanine phosphoribosyl transferase  
219 (HPRT) genes from each sample (Vandesompele et al. 2002). Samples that were found to have low  
220 expression of these control genes were eliminated from the analysis. None of the control genes showed  
221 significant differences in expression across groups.

222

## 223 **RESULTS**

224 *Lep<sup>r</sup><sup>db/db</sup>* mice produce a diabetic phenotype with hyperglycemia that differs according to age. Diabetic  
225 neuropathy and the metabolic derangements of diabetes itself (Gunnarsson 1975; Giachetti 1978; Medici

226 et al. 1999) are age-dependent. Therefore, we wanted to verify that our  $Lepr^{db/db}$  model exhibited diabetic  
227 physiological properties such as weight gain, elevated blood sugar and serum insulin to verify our diabetic  
228 model had sufficient time to develop the phenotype.

229 *Lepr<sup>db/db</sup> mice are heavier than WT.* Mean weights (Figure 2A) for diabetic mice from weeks 10 to 21,  
230 increased from 44.1 g (SD = 3.4) to 55.4 g (SD = 5.5), respectively (Holm-Šídák,  $p < 0.001$ ) and were  
231 significantly heavier than WT at both time points (Holm-Šídák,  $p < 0.001$ ). In contrast, there was not a  
232 statistically significant difference in weight for WT mice from week 10 (M = 18.9, SD = 1.6, g) to 21 (M  
233 = 20.0, SD = 1.2, g) (Figure 2A, Holm-Šídák,  $p = 0.082$ ). [Two way ANOVA: Genotype;  $F(1, 43) =$   
234  $169.319, p < 10^{-8}$ . Age;  $F(1, 43) = 21.285, p = 3.5 \times 10^{-5}$ . Interaction;  $F(1, 43) = 3.401, p = 0.072$ ].

235 *Lepr<sup>db/db</sup> mice are hyperglycemic, especially when young.* Surprisingly, in diabetic mice, fasting blood  
236 glucose (Figure 2B) significantly *decreased* from 352.54 mg/dl (SD = 115.22) at week 10 to 196.62 mg/dl  
237 (SD = 113.16) at week 21, this phenomena has been reported for C57BL/6J mice before, however,  
238 usually at later time points (~week 25-30; although still elevated compared to control (Gunnarsson 1975).  
239 Despite this, consistent with the diabetic phenotype, fasting blood glucose was significantly elevated in  
240 diabetic mice for both week 10 (Holm-Šídák,  $p < 0.001$ ) and week 21 (HS,  $p = 0.044$ ) vs WT (Figure 2B).  
241 In contrast to diabetic mice, no significant difference was observed in the fasting blood glucose of WT  
242 mice between weeks 10 (mg/dl, M = 112.47, SD = 27.14) and 21 (M = 107.17, SD = 8.72; Holm-Šídák,  $p$   
243  $= 0.901$ ). [2-way ANOVA: Genotype;  $F(1, 43) = 37.150, p = 2.7 \times 10^{-7}$ . Age;  $F(1, 43) = 8.893, p =$   
244  $0.005$ . Interaction;  $F(1, 43) = 7.762, p = 0.008$ ].

245 *Lepr<sup>db/db</sup> mice have elevated plasma insulin.* In C57BL/6J  $Lepr^{db/db}$  mice the plasma insulin level is known  
246 to increase (Gunnarsson 1975). Mean plasma insulin levels (Figure 2C) in diabetic mice were stable from  
247 week 10 (ng/ml, M = 29.51, SD = 40.19) to week 21 (ng/ml, M = 35.11, SD = 46.51; Holm-Šídák,  $p =$   
248  $0.908$ ), but were significantly elevated compared to WT (Holm-Šídák,  $p < 0.001$ ) which also did not  
249 change from weeks 10 (ng/ml, M = 0.51, SD = 0.43) to 21 (ng/ml, M = 0.33, SD = 0.07; Holm-Šídák,  $p =$

250 0.817). Together, these results support that the  $Lepr^{db/db}$  manifests the insulin resistant, type II diabetic  
251 phenotype.

252

253 *Firing properties of  $Lepr^{db/db}$  neurons changes with diabetic condition and time*

254 *DB10 and DB21 neurons have enhanced and reduced excitability, respectively.* Our hypothesis  
255 was that since diabetes causes diabetic cystopathy (Kebapci et al. 2007), presumably at least in part  
256 through diabetic autonomic dysregulation (Nadelhaft and Vera 1992),  $Lepr^{db/db}$  efferent bladder-  
257 innervating neurons of the MPG may contribute to these pathological changes and may manifest  
258 themselves as changes in intrinsic excitability. Therefore, we first examined whether different diabetic  
259 conditions would spike differently in response to depolarizing current steps from 0 to +700 pA in 50 pA  
260 increments (Figure 3A). We used 114 cells from 10-week-old WT mice (WT, n = 37); 5, 10-week-old  
261 diabetic mice (DB10, n = 41) and 5, 21-week-old diabetic mice (DB21, n = 36). As we saw no difference  
262 in metabolic parameters for WT mice from weeks 10 to 21 (Figure 2), we assume WT physiology is  
263 likewise similar to WT21. Thus all WT recordings are made from 10-week old animals. The  
264 representative neurons in Figure 3A show that DB10 (Red) neurons appear to be more excitable than WT  
265 (Black). In contrast, DB21 neurons (Green) were less excitable than either DB10 or DB21, and appeared  
266 to have reduced input resistance (discussed below). Surprisingly, across all conditions, of the 114 neurons  
267 studied, only 13 (11.4%) produced more than one spike at any current injection level. Of the neurons that  
268 spiked more than once, 76.9% (10/13) were in the DB10 condition compared to a 15.4% (2/13) and 7.7%  
269 (1/13) contribution from WT and DB21 groups respectively. The probability of finding a neuron spiking  
270 more than once was 5.4% (2/37), 24.4% (10/41) and 2.8% (1/36) for WT, DB10 and DB21 groups  
271 respectively. Supporting this difference in excitability, a Chi square test showed that these groups were  
272 not statistically independent ( $\chi^2$  (2, N = 114) = 8.268, p = 0.016). Similarly; a Kruskal-Wallis showed this  
273 data was significantly different, however, this test is more dubious as all groups had median = 1 (Table 1).  
274 Due to this low spike probability, we could not run more conventional IO curves. Therefore, instead of IO

275 curves, we examined the cumulative probability of producing one or more spikes as a function of current  
276 injected. A two way ANOVA for factors current and condition showed that cumulative probability of  
277 firing 1 or more spikes as a function of injected current was reduced in DB21 condition [Condition;  $F(2,$   
278  $1443) = 37.997$ ,  $p < 1 \times 10^{-8}$ . Current;  $F(12, 1443) = 51.817$ ,  $p < 1 \times 10^{-8}$ . Interaction;  $F(24, 1443) =$   
279  $2.038$ ,  $p = 0.002$ .]. The probability of a neuron firing at least once (Top, Figure 3C) was not significantly  
280 different between DB10 and WT neurons (Holm-Šídák,  $p = 0.883$ ), in contrast, DB21 had reduced  
281 probability of firing at least one spike from current injections of 100 to 350 pA when compared to DB10  
282 (Holm-Šídák  $p < 0.05$ ) and from 100 to 400 pA when compared to WT (Holm-Šídák  $p < 0.05$ ).  
283 Unfortunately, this particular distribution was neither normally distributed nor homoscedastic due to its  
284 binary nature. Supporting the reduced excitability of DB21 neurons was the finding that median rheobase  
285 (Left, Figure 3B) was increased in DB21 (Mdn = 300 pA, IQR = 450-200, pA) relative to WT (Mdn =  
286 175, IQR = 262.5-100, pA) (Dunn's test,  $p < 0.01$ ) and DB10 (Mdn = 150, IQR = 250-100, pA) (Dunn's  
287 test,  $p < 0.01$ ) [Kruskal Wallis ANOVA on Ranks;  $H(2) = 16.181$ ,  $p < 0.001$ ]. Together, these data  
288 support DB21 mice having reduced MPG excitability.

289  
290 *DB10 condition enhances excitability.* When examining the probability of these neurons firing twice or  
291 more, neurons from DB10 had significantly greater probability of firing more than two spikes compared  
292 to both WT and DB21 (Bottom, Figure 3C). This change was significant from current ranges 350-700 pA  
293 vs DB21 (Holm-Šídák,  $p < 0.05$ ) and 400-700 pA vs WT (Holm-Šídák,  $p < 0.05$ ) [Condition;  $F(2, 1443)$   
294  $= 43.428$ ,  $p < 1 \times 10^{-8}$ . Current;  $F(12, 1443) = 2.251$ ,  $p = 0.008$ . Interaction;  $F(24, 1443) = 1.301$ ,  $p =$   
295  $0.150$ .]. Median DB10 rheobase (Left, Figure 3B; Mdn 150, IQR = 250-100, pA) was not significantly  
296 different from WT (Mdn 150, IQR = 275-100, pA) (Dunn's,  $p > 0.05$ ), but was significantly less  
297 compared to DB21 (Mdn 300, IQR = 450-200, pA) (Dunn's,  $p < 0.05$ ) [Kruskal-Wallis,  $H(2) = 16.053$ ,  $p$   
298  $< 0.001$ ]. In agreement with this, DB10 threshold (Center, Figure 3B; Mdn = -25.0, IQR = -20.5-(-30),  
299 mV) was hyperpolarized compared to DB21 (Mdn = -19.5, IQR = -15-(-24), mV) (Dunn's test,  $p < 0.01$ ),

300 however, it was not significantly different from WT (Mdn = -22.0, IQR = -18-(-27.5), mV) but [Kruskal  
301 Wallis ANOVA on Ranks;  $H(2) = 9.351$ ,  $p = 0.009$ ]. These results, suggest that DB10 excitability is  
302 enhanced relative to WT and DB21 conditions.

303

304 *Rebound spike latency is decreased in DB10 neurons.* Another sign that excitability was increased in  
305 DB10 neurons was that latency to first spike after release of hyperpolarizing current injection (Right,  
306 Figure 3B) was significantly decreased in the DB10 condition (; Mdn = 7.9, IQR = 13.9-7.1, ms)  
307 compared to WT (Mdn = 15.4, IQR = 20.9-11.5, ms)(HS,  $p < 0.05$ ) and DB21 (Mdn = 15.7, IQR = 21.2-  
308 14.1, ms) (Holm-Šidák,  $p < 0.05$ ) conditions. These data support excitability being enhanced in the DB10  
309 condition.

310

311 *Passive properties of diabetic neurons change with age and diabetic condition*

312 As a first to characterize the mechanism of observed changes in firing of MPG neurons, we  
313 examined passive properties with the prediction that we should observe depolarized resting membrane  
314 potential (RMP) and reduced input resistance in diabetic neurons . In contrast to Tompkins et al. (2013),  
315 our data showed no difference in median resting membrane potential (Figure 4A) between WT (Mdn = -  
316 43.0, IQR = -36.5-(-47.0), mV) , DB10 (Mdn = -42.0, IQR = -39.5-(-48.5), mV) or DB21 (Mdn = -40.0,  
317 IQR = -38.0-(-45.5), mV) (Figure 4A) [Kruskal-Wallis ANOVA on ranks;  $H(2) = 2.018$ ,  $p = 0.365$ ].  
318 However, consistent with Tompkins et al. and our finding of rheobase being increased in DB21, we found  
319 that median input resistance (Figure 4B) was significantly reduced in DB21 (Mdn = 42.5, IQR = 51.8-  
320 37.3, M $\Omega$ ) (Dunn's test;  $p < 0.004$ ) but not in DB10 (Mdn = 51.0, IQR = 89.0-38.0, M $\Omega$ ) (Dunn's test,  $p$   
321  $> 0.05$ ) neurons vs WT (Mdn = 68, IQR = 89.0-44.0, M $\Omega$ ) neurons [Kruskal-Wallis ANOVA on ranks,  $H$   
322  $(2) = 10.641$ ,  $p = 0.005$ ]. We next estimated time constant by a 2-exponential fit (Golowasch et al. 2009;  
323 White and Hooper 2013). Median time constant (Figure 4C) showed a similar pattern, showing a

324 significant reduction in DB21 (Mdn = 1.8, IQR = 2.5-1.5, ms) compared to WT (Mdn = 2.3, IQR = 3.2-  
325 1.6, ms) (Dunn's test,  $p < 0.01$ ), but not compared to DB10 (Mdn = 2.5, IQR = 4.2-1.7, ms)(Dunn's test,  
326  $p > 0.05$  [Kruskal-Wallis one way ANOVA on ranks,  $H(2) = 6.805$ ,  $p = 0.033$ ]. Capacitance (Figure 4D)  
327 showed a different pattern, where both DB10 (Mdn = 48.7, IQR = 57.8-39.6, pF) and DB21 (Mdn = 41.9,  
328 IQR = 54.8-35.1, pF) were significantly increased relative to WT (Mdn = 32.9, IQR = 40.2-29.8, pF)  
329 (Dunn's test,  $p < 0.01$ ) [[Kruskal-Wallis one way ANOVA on ranks,  $H(2) = 23.187$ ,  $p < 0.001$ ]. These  
330 data suggest that capacitance is increased with diabetic condition independent of time, while time  
331 constant and resistance change with diabetic condition and age.

332

333 *Action potential properties in diabetic neurons change with age.*

334 In order to establish how observed changes in excitability caused by diabetic condition occurred,  
335 we examined whether diabetic condition and age modulated properties of the action potentials shown in  
336 figure 1.

337 *Ascending spike slope is increased in response to depolarizing current injection in the DB10 condition*  
338 *but not first rebound spike.* We looked at ascending action potential slope ( $\frac{dv}{dt}$ ) in response to depolarizing  
339 current injections (Figure 1, 9). DB10 mice had significantly greater median ascending spike slope  
340 (Figure 5A, Mdn = 30.0, IQR = 52.5-9.5, mv/ms) compared to either WT (Mdn = 8, IQR = 19.0-3.3,  
341 mv/ms) (Dunn's Test;  $p < 0.01$ ) or DB21 mice (Mdn = 5, IQR = 20.3-3.0, mv/ms) (Dunn's Test;  $p < 0.01$ )  
342 [Kruskal-Wallis ANOVA on Ranks;  $H(2) = 22.365$ ,  $p < 0.001$ ]. Interestingly, in contrast to evoked  
343 spikes, when we examined median maximum ascending slope (i.e. bins of 0.02 ms; Figure 1, 10), in  
344 rebound spikes, DB10 neurons (Figure 5C, Mdn = 62.8, IQR = 77.9-40.3, mv/ms) did not significantly  
345 differ from WT (Mdn = 55.3, IQR = 77.9-40.3, mv/ms) or DB21 (Mdn = 40.3, IQR = 56.6-25.6,  
346 mv/ms)[Kruskal-Wallis ANOVA on Ranks;  $H(2) = 5.670$ ,  $p = 0.059$ ]. We believe this difference was  
347 real and not due to a reduction in statistical power, as within WT groups, the coefficient of variance in

348 ascending slope for depolarizing current injections was greater (CV = 1.14) than for rebound spikes (CV  
349 = 0.79) . In support of there being no differences in rebound spikes, when ascending spike slope was  
350 quantified using a 10-90% rise slope criterion (Figure 1, 7), DB10 neurons (Figure 5G, Mdn = 29.8, IQR  
351 = 40.6-15.4, mv/ms) did not significantly differ from either WT (Mdn = 25.8, IQR = 39.5-12.4, mv/ms)  
352 or DB21 (Mdn = 20.0, IQR = 32.7-11.5, mv/ms) [Kruskal-Wallis ANOVA on Ranks;  $H(2) = 2.043$ ,  $p =$   
353  $0.360$ ]. These data support spike slope increasing in the DB10 condition in response to depolarization  
354 driven spikes but not rebound spikes.

355 *AP half-width is decreased while decay slope is increased in rebound spikes of DB10 neurons.* In contrast  
356 to ascending slope, we found that the median width of the action potential at half its maximal height (i.e.  
357 half-width; Figure 1, 3) was significantly reduced in the DB10 condition (Figure 5B, Mdn = 3.0 IQR =  
358 3.3-2.4, ms) compared to DB21 (Mdn = 3.7, IQR = 4.4-3.1, ms) (Dunn's test,  $p < 0.01$ ) but not vs WT  
359 (Mdn = 3.3, IQR = 4.4-2.6, ms) (Dunn's test,  $p > 0.05$ ) [Kruskal-Wallis ANOVA on Ranks;  $H(2) =$   
360  $14.991$ ,  $p < 0.001$ ].

361 Part of the reduction in DB10 half-width may be explained by the finding that that both maximal  
362 and 90-10% decay slope increased (Also see discussion). This is shown as median maximal decay slope  
363 (Figure 5D) was made more negative (increased) in DB10 neurons (Mdn = -20.0, IQR = -14.7-(-24.6),  
364 mv/ms) vs DB21 neurons (Mdn = -13.4, IQR = -9.7-(-18.9), mv/ms) (Dunn's test,  $p < 0.05$ ) but not vs  
365 WT (Mdn = -16.0, IQR = -11.3-(-22.1), mv/ms) (Dunn's test,  $p > 0.05$ ) neurons [Kruskal-Wallis ANOVA  
366 on Ranks;  $H(2) = 8.112$ ,  $p = 0.017$ ] suggesting these neurons repolarized faster. In agreement with this,  
367 mean 90-10% decay slope (Figure 5H) also became more negative in the DB10 condition(  $M = -16.7$ , SD  
368 = 5.3, mv/ms) vs WT ( $M = -12.4$ , SD = 5.6, mv/ms) (Holm Sidak,  $p = 0.001$ ) and compared to DB21( $M =$   
369  $-11.0$ , SD = 4.2, mv/ms), mv/ms)(Holm-Sidak,  $p < 0.001$ ) [One way ANOVA;  $F(2, 100) = 11.541$ ,  $p =$   
370  $3.1 \times 10^{-5}$ ]. Accordingly, median 90-10% decay time (Figure 5F) significantly decreased in DB10 (Mdn =  
371 2.7, IQR = 3.1-2.5, ms) vs WT (Mdn = 3.7, IQR = 4.8-3.0, ms) (Dunn's test,  $p < 0.01$ ) and DB21 (Mdn =  
372 4.4, IQR = 5.0-3.5, ms) (Dunn's test,  $p < 0.01$ ) [Kruskal-Wallis ANOVA on Ranks;  $H(2) = 42.223$ ,  $p <$



373 0.001]. This data, in combination with the finding that AP ascending slope did not increase in rebound  
374 spikes, suggests that AP half-width decreased primarily through a mechanism that increases AP  
375 descending slope.

376 *AP area and AHP decay constant decreased in DB10 with no changes in after hyperpolarization*  
377 *(AHP) area.* Consistent with decreased AP half-width, total AP area (excluding the AHP; Figure 5I) was  
378 significantly decreased in DB10 neurons (Mdn = 174.4, IQR = 238.8-142.7, mV·ms) relative to DB21  
379 (Mdn = 232.5, IQR = 266.7-217.5, mV·ms)(Dunn's test,  $p < 0.05$ ) but not when compared to WT (Mdn =  
380 209.8, IQR = 290.7-172.0, mV·ms) (Dunn's test,  $p > 0.05$ ) [Kruskal-Wallis ANOVA on Ranks;  $H(2) =$   
381 12.320,  $p = 0.002$ ]. This was not due to changes in spike height, as neither DB10 (Mdn = 63.6, IQR =  
382 78.1-37.9, mV) nor DB21 (Mdn = 61.2, IQR = 75.9-53.8, mV) differed significantly in spike height  
383 (Table 1) relative to WT (Mdn = 64.5, IQR = 80.1-52.7, mV) [Kruskal-Wallis ANOVA on Ranks;  $H(2) =$   
384 0.498,  $p = 0.779$ ]. If AP area decreased, a possible mechanism would be activation of outward currents,  
385 and one might expect to see an enhanced AHP. However, no change in AHP area (Figure 5J) for DB10  
386 (Mdn = -141.6, IQR = -88.1-(-259.2), mV·ms), or DB21 (Mdn = -121.9, IQR = -92.1-(-200.5), mV·ms) vs  
387 WT (Mdn = 116.6, IQR = -80.6-(-251.1), mV·ms) was observed [ $H(2) = 0.530$ ,  $p = 0.767$ ]. Nor were  
388 changes were observed in AHP height (figure 1, 2) in DB21 (Figure 5K, Mdn = -10.0, IQR = -5.8-(-12.9),  
389 mv), DB10 (Mdn = -11.6, IQR = -7.7-(-15.4), mv) conditions vs WT (Mdn = -12.4, IQR = -8.5-(-15.9),  
390 mv) [Kruskal-Wallis ANOVA on Ranks;  $H(2) = 2.900$ ,  $p = 0.235$ ]. Despite our finding of stable AHP  
391 amplitude and area, we did see that AHP decay tau significantly decreased in DB10 neurons (Mdn = 13.0,  
392 IQR = 16.5-10.5, ms) vs WT (Mdn = 16.9, IQR = 21.2-16.9, ms) (Dunn's,  $p < 0.01$ ) and DB21 (Mdn =  
393 17.0, IQR = 20.0-13.4, ms) (Dunn's,  $p < 0.05$ ) (Figure 5L) [Kruskal-Wallis ANOVA on ranks;  $H(2) =$   
394 11.896,  $p = 0.003$ ]. These data suggest that diabetic condition and age affect interact to alter AP area and  
395 AHP decay constant while leaving other AP parameters unmodified.

396 *2<sup>nd</sup> AHPs and ADPs after 145 ms.* When quantifying properties of the AHP, it was found that  
397 after the initial AHP, some neurons had after depolarizations, while some had secondary slower AHPs



398 and still others had both. We attempted to systematically quantify this across conditions by analyzing the  
399 change in voltage 145 ms after the descending stroke of the AP recrossed baseline. However, this comes  
400 with the caveat that some neurons could not be quantified due to no change in baseline, multiple rebound  
401 spikes, or loss of cells. Within 73.0 % (27/37) of quantified WT neurons, 81.5% (22/27) displayed  
402 afterdepolarizations, while the remaining 18.5% (5/27) displayed secondary after hyperpolarizations and  
403 none displayed both. Within DB10 neurons 4.9% (2/41) could not be classified due to multiple rebound  
404 spikes. However, of the 82.9% (34/41) that could be quantified, 44.1% (15/34) showed ADPs, 20.6%  
405 (7/34) showed secondary AHPs; in contrast to WT; where 29.4% (10/34) of these neurons showed both  
406 AHPs and ADPs. Within 94.4% (34/36) of quantified DB21 neurons, 76.5% (26/34) showed ADPs, 2.9%  
407 (1/34) showed secondary AHPs, while 20.6% (7/34) showed both. A Chi Square test showed that these  
408 groups were statistically independent ( $\chi^2$  (4, N = 95) = 15.960,  $p = 0.003$ ). Alternatively, when we just  
409 quantified the absolute voltage change at 145 ms, DB10 (Mdn = -0.2, IQR = 2.0-(-0.7),  $\Delta mV$ ) (Dunn's,  $p$   
410  $< 0.05$ ) but not DB21 (Mdn = 0.8, IQR = 1.8-0.9,  $\Delta mV$ ) (Dunn's,  $p > 0.05$ ) was significantly different  
411 from WT (Mdn = 1.8, IQR = 3.8-0.9,  $\Delta mV$ ) (Table 1) [Kruskal-Wallis ANOVA on Ranks;  $H(2) =$   
412 10.766,  $p = 0.005$ ]. This data suggests that the DB10 condition is more likely to have slow AHPs or a lack  
413 of ADPs relative to WT.

414

#### 415 *Ion Channels Show Widespread Changes in Expression in Both DB10 and DB21 Animals*

416 We specifically focused on subsets of ion channel and receptor genes for this study to start to  
417 understand the underlying mechanisms for changes in excitability that we detected in MPG neurons of  
418 diabetic animals. We sampled alpha subunits for voltage-dependent  $Ca^{2+}$  channels (*CACNA1A-H*), a  
419 subset of  $Na^+$  channels (*SCNx*), and six families of  $K^+$  channels (*KCNA*, *KCNB*, *KCNC*, *KCND*, *KCNN*,  
420 *KCNMA*). Of 30 ion channel genes studied, 8 were significantly different between DB10 and control  
421 wild-type animals (Figure 6). The voltage-dependent  $Ca^{2+}$  channels *CACNA1A*, *CACNA1E* and  
422 *CACNA1H* were significantly higher in DB10 animals relative to control. The only  $Na^+$  channel gene that

423 was changed was a significant increase in *SCN2A1* in DB10 animals. In addition, 4 K<sup>+</sup> channel genes  
424 showed altered expression in DB10 animals: *KCNA3* was significantly lower in DB10 animals, while  
425 *KCNB1*, *KCNC2*, and *KCND3* were significantly higher in DB10 mice.

426 In DB21 animals, 12 channel genes showed differential expression relative to wild-type controls  
427 (Figure 6). *CACNAID* and *CACNAIG* were significantly higher in DB21 animals relative to control.  
428 There were no significant differences in sodium channel gene expression seen between DB21 and wild-  
429 type animals. However, there were 10 different K<sup>+</sup> channel genes that showed changes in expression in  
430 DB21 animals. *KCNA2*, *KCNA3*, *KCNA5*, and *KCNC3* all were significantly lower in DB21 animals than  
431 wild-type, with *KCNA2* and *KCNC3* expression all but abolished in the DB21 animals. *KCNC4*, *KCND2*,  
432 *KCND3*, *KCNN1*, *KCNN3* and *KCNMA1* were all significantly higher in DB21, with *KCND2* expression  
433 only detectable in DB21 animals. Most of these changes are seen only in DB21 animals and not in DB10,  
434 including *KCNA2*, *KCNA5*, *KCNC3*, *KCNC4*, *KCND2*, *KCNN1*, *KCNN3* and *KCNMA1*.

435 Some changes seen in DB10 animals resolve to control levels in the DB21 animals, while others  
436 persist throughout the DB21 time point (Figure 6). *KCNA3* is significantly lower in DB10 animals, and  
437 this change persists into the DB21 group. *KCND3* is significantly increased in both DB10 and DB21  
438 animals. Conversely, *KCNB1* is significantly higher in the DB10 animals, but returns to control levels in  
439 DB21 animals. Finally, there are some channels that are significantly different only between DB10 and  
440 DB21. *KCNA1* and *KCND1* are significantly higher in DB21 than DB10, although there is a trend  
441 towards these two channels being downregulated in DB10 overall, even though this does not reach  
442 statistical significance relative to control. The converse is true for *KCNB2*, which is significantly higher in  
443 DB10 than DB21 – although there is a trend for this channel to be transiently upregulated in the DB10  
444 group.

445

446 *Principal Components Analysis to Further Examine Differences Among Groups in Firing Properties and*  
447 *Channel Expression*

448 We next used principal component analysis (PCA) to visualize potential patterns and correlations  
449 in the features that may underlie distinctions in both the spike properties and channel expression across  
450 groups. A variance plot of the first two principal components (PC) for spike characteristics (Figure 7A)  
451 demonstrates that there is overlapping features in all three groups that do not distinguish these groups in  
452 any obvious way. There is one major PC (PC1) that accounts for the majority of the variance in the data  
453 42.5%, Figure 7B). The variables that most contribute to the variance in spike characteristics largely  
454 consist of features involved in shaping the action potential dynamics underlying spike shape, such as  
455 decay slope, rise slope, and the amplitude of the spike (e.g. spike height, peak amplitude). These would  
456 consistent with changes in Na<sup>+</sup> and K<sup>+</sup> channel expression, particularly those subtypes involved in the  
457 spiking itself. However, there is no combination of features that separates the diabetic animals from the  
458 wild-types, or each other, in a discrete fashion.

459 The PCA for channel expression in the MPG tells a different story. The variance plot of PC1 and  
460 PC2 (Figure 8A) shows clear separation of all three groups, and the scree plot (Figure 8B) notes that these  
461 two PCs account for the majority of the variance in the data. When looking at the channels that contribute  
462 to PC1 and PC2, it is also clear validation of the changes in expression reported in Figure 6. By  
463 examining the vector plot in Figure 8A and the contributions to PC1 in Figure 8B, it is possible to  
464 discriminate a group of channels largely responsible for distinguishing the DB21 animals. The top ten  
465 contributors to PC1 consists entirely of channels that are uniquely differentially expressed in DB21  
466 animals relative to both DB10 and control. Conversely, by examining the top ten contributors to PC2 – in  
467 conjunction with the vector plot – it can be seen that PC2 consists of channels uniquely differentially  
468 expressed in DB10 animals (*CACNA1A*, *CACNA1E*, *SCN2A1*, *KCNBI*, *KCNC2*) as well as channels that  
469 are both changed in the same direction in DB10 and DB21 (*KCND3*).

470

471 **DISCUSSION**

472 Diabetic cystopathy has formally been documented since 1864 (Faerman et al. 1971), yet the only direct  
473 attempt to document how diabetes impacts efferent bladder innervating neurons was by Tompkins et al.,  
474 (2013) who focused largely on synaptic properties. Therefore, in this study we attempted to identify for  
475 the first time the impacts of a type II diabetes model on the intrinsic properties of bladder-innervating  
476 parasympathetic neurons in female mice. We hypothesized that passive properties, overall excitability and  
477 action potential properties in MPG neurons would change in an age-dependent manner within the diabetic  
478 condition. Furthermore, we examined underlying changes in mRNA levels for voltage-dependent ion  
479 channels in the whole ganglion as a reflection of the most salient of changes in excitability and firing of  
480 MPG neurons.

481 *Lepr*<sup>db/db</sup> mice on the C57Bl6/J strain used here model hyperglycemia and persistent  
482 hyperinsulinemia with beta cell hypertrophy, whereas those on the BKS background strain progress to  
483 beta cell failure (Hummel et al. 1972). Although the mice in this study were diabetic at both ages, their  
484 hyperglycemia was somewhat worse at 11 weeks than at 21 weeks, consistent with previous observations  
485 in this strain (Breyer et al. 2005; Sullivan et al. 2007). This improvement was consistent with the  
486 constant, or slightly increasing serum insulin concentrations at 21 weeks, indicating that while the beta  
487 cells are not able to adequately compensate for insulin resistance, they have not undergone beta cell  
488 failure.

489

490 *Diabetes interacts with time to first increase then decrease MPG neuron excitability*

491 One of our most important findings was that excitability of MPG neurons in *Lepr*<sup>db/db</sup> females changes  
492 nonlinearly with the amount of time exposed to the diabetic environment. Specifically, we observed that  
493 10 week *Lepr*<sup>db/db</sup> mice had an increased probability of firing two or more spikes, and decreased rebound  
494 spike latency; both of which are measures of increased overall neuronal excitability. In contrast, week 21

495  $Lepr^{db/db}$  neurons changed in the opposite direction, exhibiting a decrease in spike probability and  
496 increased rheobase, both of which are indications of lower overall excitability. This trend of a change in  
497 firing properties at 10 weeks that is then rectified at 21 weeks is also seen in the characteristics of action  
498 potentials of MPG neurons. Specifically, spikes are narrower (as seen by a decreased half-width,  
499 increased ascending slope and enhanced decay slope, and decreased decay time in DB10 animals), and  
500 AHPs are shorter are in the DB10 animals but return to control levels in the DB21 group. These data are  
501 consistent with the hypothesis that long-term diabetes results in change in MPG neuron that potentially  
502 are compensated for via long-term plasticity mechanisms in the DB21 animals. Regardless of whether the  
503 changes in excitability and action potential properties are compensatory or represent disease progression  
504 in the context of the entire LUT, there is clear change in the characteristics of MPG neurons over the  
505 course of 10-21 weeks in diabetic animals.

506         Because normal bladder function and diabetic cystopathy are the result of a complex interaction  
507 of the activities of sympathetic, parasympathetic, and sensory feedback mechanisms combined with  
508 bladder compliance and detrusor properties, it is not possible to interpret our results directly in context of  
509 mechanisms of changes in bladder output as a result of diabetes. However, the time course of changes in  
510 MPG neuron excitability mirror those of bladder output over the progression of diabetic cystopathy in  
511 rodents. For example, in type I diabetic mice there is a sharp decline in basal bladder pressure and mean  
512 threshold pressure from weeks 9-12 that then is rectified to control levels by 20 weeks (Daneshgari et al.  
513 2006a). Similar time course changes in bladder output features as measured by cystometrogram have been  
514 documented in rats as well, whereby diabetic bladders transition from compensated to decompensated  
515 states between 9-12 weeks following onset of diabetes (Daneshgari et al. 2006b). Therefore, while a direct  
516 mechanistic link to bladder output cannot be made from our data, the results are consistent with the  
517 overall change in LUT output over the time course of diabetic cystopathy.

518

519 *Potential mechanistic insights via interpretation of changes in mRNA levels*

520 It would be an over-interpretation to directly infer mechanisms underlying physiological changes  
521 in single neurons from data collected at the mRNA level from whole ganglia. However, the steady-state  
522 mRNA levels for ion channels provide a high-throughput opportunity to generate hypothesis regarding  
523 underlying mechanistic changes in ionic currents. Indeed, we see multiple changes in channel mRNAs  
524 that are consistent with the physiological changes we report. In this section, we will highlight some of the  
525 most salient changes we found at the level of neuronal properties, and cautiously hypothesize on potential  
526 underlying mechanism via changes at the mRNA level.

527 In 10-week *Lepr<sup>db/db</sup>* mice we observed that although rheobase did not change, several properties  
528 associated with excitability did change. The most salient of these properties was the increase of the  
529 probability of firing 2 or more spikes. As shown in Figure 3A and also previously documented (Suzuki  
530 and Rogawski 1989; Tompkins et al. 2013), MPG neurons can spike once or many times, a phenomena  
531 observed in many other autonomic neuron types (Cassell et al. 1986; Malin and Nerbonne 2001; Springer  
532 et al. 2015). One obvious possible mechanism for generating multiple spikes is the activation of a  
533 depolarizing current with somewhat slower kinetics that can maintain depolarization above threshold to  
534 allow for the generation of multiple spikes. Our data show changes in channel expression that are  
535 consistent with this hypothesis. In particular, there is a significant increase in mRNA levels for the  
536 calcium channels *CACNA1A*, *CACNA1E*, and *CACNA1H* in DB10 animals relative to both WT and  
537 DB21. Furthermore, *CACNA1E* levels overall are the most abundant calcium channel mRNA that we  
538 detected, with levels an order of magnitude higher than any other calcium channel subunit. *CACNA1E*  
539 encodes the R-type current  $Ca_v2.3$ , which is known to make up ~25% of total calcium current in rat MPG  
540 neurons (Won et al. 2006), and  $Ca_v3.2$  – encoded by *CACNA1H* – is the predominant T-type channel in  
541 rat MPG (Lee et al. 2002). R-type currents are known to influence bursting output in CA1 pyramidal  
542 neurons (Metz et al. 2005), and T-type currents in many neurons trigger low-threshold spikes, which in  
543 turn generate bursts of action potentials (Perez-Reyes 2003). While the interplay of multiple calcium  
544 channel subunits and the remaining ionic conductances of the cell are quite complex in terms of

545 generating different output patterns, increases in R-type and T-type currents would be a feasible way to  
546 influence the multiple spiking phenotype in DB10 animals.

547 We also observed increased ascending and descending spike slopes, and decreased spike half-  
548 width in the DB10 animals relative to WT and DB21. We observed increased expression of mRNAs  
549 coding for  $\text{Na}_v1.2$  (*SCN2A1*), as well as a trend for increased  $\text{Na}_v\beta1$  (*SCN1B*) expression, in the DB10  
550 animals.  $\text{Na}_v1.2$  channels are largely localized to the axons and initial segments of unmyelinated neurons  
551 (Vacher et al. 2008), which is consistent with the post-ganglionic fibers of the MPG.  $\text{Na}_v\beta1$  is known to  
552 interact with  $\text{Na}_v1.2$  channels to increase surface expression of these subunits (Isom et al. 1995).  
553 Therefore, increases in expression of *SCN2A1* and *SCN1B* would be expected to increase AP upstroke,  
554 which was observed for depolarizing current injections but not rebound spikes. In addition,  $\text{K}_v3.2$  and  
555  $\text{K}_v2.1$  are potassium channels with relatively high threshold activation and fast deactivation such that they  
556 have both been implicated as large contributors to the AP repolarization and as a consequence decrease  
557 AP width (Rudy and McBain 2001; Liu and Bean 2014). The upregulation of their constituent mRNA  
558 subunits (*KCNC2* and *KCNB1* respectively) is entirely consistent with the firing phenotypes observed.

559 As we observed increases in ascending spike slope to depolarizing current injections, but not  
560 rebound current injections in DB10 neurons, it is possible that high threshold potassium currents with fast  
561 deactivation time constants could play a role in permitting multiple spikes during depolarizing current  
562 injections by enhancing sodium channel de-inactivation. As  $\text{K}_v2$  family members are known to encode  
563 delayed rectifiers, and  $\text{K}_v3$  channels have fast activation and deactivation rates associated with sustained  
564 higher-frequency firing, then the fact that we see increased  $\text{K}_v3.2$  (*KCNC2*) and  $\text{K}_v2.1$  (*KCNB1*)  
565 expression is also consistent with these results. While this is well documented for  $\text{K}_v3.2$  as it is a high  
566 threshold, fast deactivating (Weiser et al. 1994; Rudy and McBain 2001) ion channel, it is less clear that  
567 this is the case for  $\text{K}_v2.1$  as it is intermediate in these parameters. For example, in the superior cervical  
568 ganglion (SCG) neurons,  $\text{K}_v2.1$  has somewhat high  $V_{1/2}$  activation, slow activation, slow or no  
569 inactivation, but a relatively fast deactivation (Liu and Bean 2014). If  $\text{K}_v2.1$  is playing a role in keeping

570 the functional pool of sodium channels available through de-inactivation, as it is thought to do in SCG  
571 neurons (Liu and Bean 2014), then we expect its upregulation should prevent decay in spike height during  
572 a train of spikes. Therefore, to test this prediction, we examined the ratio of the 2<sup>nd</sup> to 1<sup>st</sup> spike height of  
573 multi-spiking neurons. A t-test showed that 2<sup>nd</sup> to 1<sup>st</sup> spike ratio of DB10 neurons ( $0.79 \pm 0.03$ ,  $n = 8$ )  
574 were significantly less attenuated than WT neurons ( $0.48 \pm 0.11$ ,  $n = 2$ ) ( $t(8) = -4.416$ ,  $p = 0.002$ ). This  
575 suggests that together  $K_v3.2$  and  $K_v2.1$  could play a role in keeping sodium currents de-inactivated in the  
576 DB10 condition.

577 DB21 neurons were significantly less excitable than both DB10 and wild type neurons: both  
578 rheobase and input resistance were significantly reduced compared to wildtype, and DB21 neurons did  
579 not produce a multi-spiking output when stimulated. DB21 neurons had significantly upregulated mRNAs  
580 encoding several low threshold slow deactivating potassium currents that would be expected to reduce  
581 excitability. The upregulation of *KCNA1* ( $K_v1.1$ ) likely contributes to reduced excitability given a  
582 relatively low threshold of activation ( $\sim 32$  mV) and intermediate deactivation time constant (Grissmer et  
583 al. 1994). The upregulation of *KCND2* ( $K_v4.2$ ) is consistent with the observed decrease in excitability and  
584 may explain in part why the DB21 condition did not share the multispiking phenotype with DB10. This is  
585 because in cultured rat superior cervical ganglion neurons, Malin and Nerbonne (2000) showed that when  
586  $K_v4.2$  is overexpressed, the number of neurons displaying the multi-spiking neuron phenotype is  
587 decreased, and when the gene is downregulated by expression of a dominant negative transgene, there is a  
588 corresponding increase in the multi-spiking phenotype. Interestingly, the authors also report increased  
589 input resistance in cells with reduced  $K_v4.2$ , and decreased input resistance with overexpression of  $K_v4.2$   
590 (Malin and Nerbonne 2001) which is consistent with the significant decrease in  $R_{in}$  in DB21 neurons.

591

592

593



594 *Conclusions*

595           We expected excitability of Lepr<sup>db/db</sup> neurons to change with increasing intensity from weeks 10  
596 to 21 as diabetes progressed as diabetic neuropathy is a function of both hyperglycemia and duration in  
597 humans (Maser et al. 1989; Davies et al. 2006), rats (Mattingly and Fischer 1983; Sasaki et al. 2002) and  
598 mice (Giachetti 1978; Hinder et al. 2017; Liu et al. 2017). Contrary to this hypothesis, many properties  
599 associated with excitability changed in 10-week animals, but were then resolved closer to wild-type levels  
600 in the 21-week animals. These properties include both characteristics of intrinsic excitability (e.g.  
601 probability to fire, threshold, and rebound latency) as well as many of the characteristics of the individual  
602 action potentials of these neurons as well. Yet, our expression profiling of the MPGs does not simply  
603 reveal a resolution at 21-weeks of changes in expression that occur in the 10-week animals. Rather, our  
604 PCA reveals that the overall expression patterns in MPGs of wild type, 10-week, and 21-week animals are  
605 entirely distinct. Taken together, we suggest that these results represent an apparent compensatory  
606 response, where neurons of the MPG in younger diabetic mice are less adapted to hyperglycemia, or the  
607 associated bladder cystopathy, than older diabetic mice that have been exposed to hyperinsulinemia for  
608 longer times.

609

610

611 TABLES

612

**Table 1.** Non-parametric (non-normal or non-homoscedastic) negative or redundant statistical summary † Internal control that is best fit line to sampled interval. ‡ n was 27, 32, 34 for WT, DB10 and DB21 respectively.

| Property (units)                                                   | WT<br>n = 35 |                          |                          | DB10<br>n = 34 |                          |                          | DB21<br>n = 34 |                          |                          | Kruskal-<br>Wallis<br>p = |
|--------------------------------------------------------------------|--------------|--------------------------|--------------------------|----------------|--------------------------|--------------------------|----------------|--------------------------|--------------------------|---------------------------|
|                                                                    | Mdn.         | 75 <sup>th</sup><br>per. | 25 <sup>th</sup><br>per. | Mdn.           | 75 <sup>th</sup><br>per. | 25 <sup>th</sup><br>per. | Mdn.           | 75 <sup>th</sup><br>per. | 25 <sup>th</sup><br>per. |                           |
| 1 <sup>st</sup> spike latency at depolarizing rheobase (ms)        | 14.2         | 17.7                     | 10.8                     | 13.9           | 17.6                     | 12.2                     | 15.3           | 18.3                     | 11.7                     | 0.793                     |
| 1 <sup>st</sup> spike latency for Rebound spikes (-500 pA)         | 15.2         | 22.3                     | 11.6                     | 7.9            | 13.9                     | 7.9                      | 15.7           | 21.2                     | 14.1                     | <0.001                    |
| Baseline slope (mV/ms) <sup>†</sup>                                | -0.3         | -0.2                     | -0.5                     | -0.3           | -0.1                     | -0.4                     | -0.2           | -0.1                     | -0.4                     | 0.424                     |
| Time from spike peak to AHP peak (ms)                              | 8.3          | 11                       | 7.3                      | 6.9            | 7.5                      | 6.1                      | 9.8            | 11.2                     | 8.1                      | <0.001                    |
| Spike Height (mV)                                                  | 64.5         | 80.1                     | 52.7                     | 63.6           | 78.1                     | 37.9                     | 61.2           | 75.9                     | 53.8                     | 0.779                     |
| Max Spikes (spikes)                                                | 1.0          | 1.0                      | 1.0                      | 1.0            | 1.5                      | 1.0                      | 1.0            | 1.0                      | 1.0                      | 0.004                     |
| Rebound spikes (-500 pA; spikes)                                   | 1.0          | 1.0                      | 1.0                      | 1.0            | 1.0                      | 1.0                      | 1.0            | 1.0                      | 1.0                      | 0.628                     |
| Change in Membrane potential 145 ms after AP repolarization (mV) ‡ | 1.8          | 3.8                      | 0.9                      | -0.2           | 2.0                      | -0.7                     | 0.8            | 1.8                      | 0.2                      | 0.005                     |
|                                                                    |              |                          |                          |                |                          |                          |                |                          |                          |                           |

613

614

615

**Table 2.** Negative or redundant statistical summary that was normal and homoscedastic. † Internal control that is essentially the RMP right after rebound. ‡ Redundant with area ( $\frac{1}{T} \int_{t_0}^{t_0+T} Area$ )

| Property (units)           | WT                  | DB10                | DB21                | One- way<br>ANOVA<br>p = |
|----------------------------|---------------------|---------------------|---------------------|--------------------------|
|                            | Mean (SD)<br>n = 35 | Mean (SD)<br>n = 34 | Mean (SD)<br>n = 34 |                          |
| AP Mean Height, (mV) ‡     | 1.8 (2.5)           | 0.7(1.7)            | 1.7(1.6)            | 0.045                    |
| Baseline (mV) <sup>†</sup> | -41.0 (7.8)         | -41(7.6)            | -38.8(5.9)          | 0.378                    |

616

617 **FIGURE LEGENDS**

618 **Figure 1. Action potential properties measured from depolarization and rebound induced spikes.**

619 Each number corresponds to a given measurement, as described in the Methods. These numbers are  
620 referred to in the Results section when relevant.

621 **Figure 2. Lepr<sup>db/db</sup> mice show a strong diabetic phenotype at week 10 with hyperglycemia that is**

622 **somewhat reduced at week 21.** Diabetes associated metabolic parameters of DB vs WT mice at different

623 times; week 10 (*left*) or week 21 (*right*) in either wildtype (white) or diabetic conditions (red and green

624 for weeks 10 and week 21 respectively). **A.** A two-way ANOVA for factors genotype and age showed

625 that mouse weight was influenced by genotype and age. [Genotype;  $F(1, 43) = 169.319, p < 10^{-8}$ . Age;  $F$

626  $(1, 43) = 21.285, p = 3.5 \times 10^{-5}$ . Interaction;  $F(1, 43) = 3.401, p = 0.072$ ] **B.** A two-way ANOVA for

627 factors genotype and age showed that fasting blood glucose was influenced by genotype and age.

628 [Genotype;  $F(1, 43) = 37.150, p = 2.7 \times 10^{-7}$ . Age;  $F(1, 43) = 8.893, p = 0.005$ . Interaction;  $F(1, 43) =$

629  $7.762, p = 0.008$ ]. **C.** Two-way ANOVA for factors genotype and age showed that fasting serum insulin

630 was influenced by genotype. [Genotype;  $F(1, 43) = 71.608, p < 10^{-8}$ . Age;  $F(1, 43) = 0.0595, p = 0.809$ .

631 Interaction;  $F(1, 43) = 0.0113, p = 0.916$ ]. Holm-Sidak Post-Hoc test; \*,  $p < 0.05$ ; \*\*,  $p < 0.01$ . Error bars

632 are SEM.

633 **Figure 3. DB10 and DB21 conditions increase and decrease excitability of MPG neurons,**

634 **respectively.** **A.** Representative traces of intracellular currents injections of -500 pA, 100 pA and 500 pA

635 current injections in WT10 (black), DB10 (red) or DB21 (green). **B. Left:** Kruskal-Wallis one way

636 ANOVA on ranks showed that rheobase was significantly altered by diabetic condition [ $H(2) = 16.053, p$

637  $< 0.001$ ]. **Center:** A Kruskal-Wallis one way ANOVA on ranks showed that threshold (Figure 1, 12) was

638 significantly altered by diabetic condition [ $H(2) = 9.351, p = 0.009$ ]. **Right:** Kruskal-Wallis one way

639 ANOVA on ranks showed that diabetic condition significantly altered latency to rebound spike [ $H(2) =$

640  $22.897, p < 0.001$ ]. Shown are Medians, quartiles and outliers. Dunn's test; \*,  $p < 0.05$ ; \*\*,  $p < 0.01$ . \*\*\*,

641  $p < 0.001$ . **C. Top:** Two-way ANOVA for factors current and condition showed that cumulative

642 probability of firing 1 or more spikes as a function of injected current was reduced in DB21 condition  
643 [Condition;  $F(2, 1443) = 37.997$ ,  $p < 1 \times 10^{-8}$ . Current;  $F(12, 1443) = 51.817$ ,  $p < 1 \times 10^{-8}$ . Interaction;  $F$   
644  $(24, 1443) = 2.038$ ,  $p = 0.002$ .]. *Bottom*: A two-way ANOVA showed that the Cumulative probability of  
645 firing 2 or more spikes as a function of injected current was increased in the DB10 condition [Condition;  
646  $F(2, 1443) = 43.428$ ,  $p < 1 \times 10^{-8}$ . Current;  $F(12, 1443) = 2.251$ ,  $p = 0.008$ . Interaction;  $F(24, 1443) =$   
647  $1.301$ ,  $p = 0.150$ .]. Note difference in scale. Holm-Sidak post hoc tests:  $p < 0.05$ ; \* WT10 vs DB10, †  
648 WT10 vs DB21, ‡ DB10 vs DB21. Shown are Means  $\pm$  SEM.

649 **Figure 4.** Effect of condition for WT, DB10, and DB21 condition on passive properties of MPG neurons.  
650 **A.** A Kruskal-Wallis one-way ANOVA on ranks showed that diabetic condition did not affect resting  
651 membrane potential (RMP) [ $H(2) = 2.017$ ,  $p = 0.365$ ]. **B.** A Kruskal-Wallis one-way ANOVA on ranks  
652 showed that diabetic condition altered input resistance ( $R_{in}$ ) [ $H(2) = 10.641$ ,  $p = 0.005$ ] **C.** A Kruskal-  
653 Wallis one way ANOVA on ranks showed that diabetic condition altered membrane time constant [ $H(2)$   
654  $= 6.805$ ,  $p = 0.033$ ] **D.** A Kruskal-Wallis one-way ANOVA on ranks showed that diabetic condition  
655 altered capacitance of MPG neurons [ $H(2) = 23.187$ ,  $p < 0.001$ ]. Data shown are medians, quartiles and  
656 outliers. Dunn's test: \*  $p < 0.05$ ; \*\*,  $p < 0.01$ .

657 **Figure 5. Action potential (AP) parameters are altered by DB condition in mouse MPG neurons.** AP  
658 properties illustrated in figure 1 were quantified in 10 week wildtype (Black), 10 week Diabetic (Red) and  
659 21 week diabetic (Green) in mouse MPG neurons. All data except A were quantified from rebound  
660 spikes. **A.** A Kruskal-Wallis one way ANOVA on ranks showed that diabetic condition affected  
661 ascending spike slope elicited by depolarizing current injection (Figure 1, 9) during depolarizing current  
662 injection of MPG neurons [ $H(2) = 22.010$ ,  $p < 0.001$ ]. **B.** A Kruskal-Wallis one way ANOVA on ranks  
663 showed that diabetic condition affected AP half-width (Figure 1, 3) [ $H(2) = 14.892$ ,  $p < 0.001$ ]. **C.** A  
664 Kruskal-Wallis one way ANOVA on ranks showed that diabetic condition did not significantly alter AP  
665 maximum rise slope (Figure 1, 10) [ $H(2) = 5.670$ ,  $p = 0.059$ ]. **D.** A Kruskal-Wallis one way ANOVA on  
666 ranks showed that diabetic condition altered maximum AP decay slope of (Figure 1, 11) [ $H(2) = 8.112$ ,  $p$

667 = 0.017]. **E.** A Kruskal-Wallis one way ANOVA on ranks showed that diabetic condition altered AP 10-  
668 90% rise time (Figure 1, 4) [H (2) = 6.464, p = 0.039]. **F.** A Kruskal-Wallis one way ANOVA on ranks  
669 showed that diabetic condition altered 90-10% decay time (Figure 1, 5) [H (2) = 42.223, p < 0.001]. **G.** A  
670 Kruskal-Wallis one way ANOVA on ranks showed that diabetic condition did not alter AP 10-90% rise  
671 slope (Figure 1, 7) [H (2) = 2.043, p = 0.360]. **H.** A one-way ANOVA showed that diabetic condition  
672 altered 90-10% decay slope (Figure 1, 8) [F (2, 101) = 11.541, p = 3.1 x 10<sup>-5</sup>]. **I.** A Kruskal-Wallis one-  
673 way ANOVA on ranks showed that diabetic condition altered AP area (Figure 1, 6) [H (2) = 12.320, p =  
674 0.002]. **J.** A Kruskal-Wallis one-way ANOVA on ranks showed that diabetic condition did not alter AHP  
675 area (Figure 1, 13) [H (2) = 0.530, p = 0.767]. **K.** A Kruskal-Wallis one-way ANOVA on ranks showed  
676 that diabetic condition did not alter AHP amplitude (Figure 1, 2) [H (2) = 2.900, p = 0.235]. **L.** A  
677 Kruskal-Wallis one way ANOVA on ranks showed that diabetic condition altered AHP decay tau (Figure  
678 1, 14) [H (2) = 11.896, p = 0.003]. Data shown are medians, quartiles and outliers. Dunn's test: \* p <  
679 0.05; \*\*, p < 0.01.

680

681 **Figure 6. mRNA copy numbers for ion channel subunits of across WT, DB10, and DB21**

682 **experimental groups.** Significant differences as noted (p < 0.05; post-hoc Holm-Šidák analyses  
683 following One-Way ANOVA) represent pairwise comparisons across all three groups. Data shown are  
684 medians, quartiles and each individual value from a given animal.

685 **Figure 7. Principal components analysis (PCA) of spike characteristic across WT, DB10, and DB21**

686 **mice. A.** The first two principal components (PC1 and PC2) define the x-and y-axes respectively. PC1  
687 accounted for 42.5% of the variance while PC2 accounted for 14.6%. By and large, all three groups show  
688 overlapping distribution of variance across PC1 and PC2. **B.** Scree plot demonstrating the amount of  
689 variance accounted for across the first 10 principal components. A substantial plurality of the variance is  
690 accounted for in the first principal component, while the remainder contribute far less to the variance in

691 the data. C. Post-hoc analysis of the variables that contribute to the variance in PC1 reveals that relatively  
692 equal contributions are found from variables associated with spike shape and AHP amplitude.

693 **Figure 8. PCA analysis of ion channel mRNA levels across WT, DB10, and DB21 mice. A.** The first  
694 two principal components (PC1 and PC2) define the x-and y-axes respectively. PC1 accounted for 25.6%  
695 of the variance while PC2 accounted for 21.9%. The distribution across PC1 and PC2 reveals three  
696 distinct ion channel expression profiles for WT, DB10, and DB21 animals. **B.** Scree plot demonstrating  
697 the amount of variance accounted for across the first 10 principal components. The majority of the  
698 variance is accounted for in the PC1 and PC2, while the remainder contribute far less to the variance in  
699 the data. **C.** Post-hoc analysis of the variables that contribute to the variance in PC1 and PC2 reveals  
700 distinct channel subunits that account for the distinct patterns of expression seen in all three experimental  
701 groups.

702

703 REFERENCES

- 704 **Breyer MD, Bottinger E, Brosius 3rd FC, Coffman TM, Harris RC, Heilig CW, Sharma K, Amdcc.**  
705 Mouse models of diabetic nephropathy. *J Am Soc Nephrol* 16: 27–45, 2005.
- 706 **Cassell JF, Clark AL, McLachlan EM.** Characteristics of phasic and tonic sympathetic ganglion cells of  
707 the guinea-pig [Online]. *J Physiol* 372: 457–483, 1986. <http://www.ncbi.nlm.nih.gov/pubmed/2425087>.
- 708 **Chen H, Charlat O, Tartaglia LA, Woolf EA, Weng X, Ellis SJ, Lakey ND, Culpepper J, Moore KJ,**  
709 **Breitbart RE, Duyk GM, Tepper RI, Morgenstern JP.** Evidence that the diabetes gene encodes the  
710 leptin receptor: identification of a mutation in the leptin receptor gene in db/db mice [Online]. *Cell* 84:  
711 491–495, 1996. <http://www.ncbi.nlm.nih.gov/pubmed/8608603>.
- 712 **Daneshgari F, Huang X, Liu G, Bena J, Saffore L, Powell CT.** Temporal differences in bladder  
713 dysfunction caused by diabetes, diuresis, and treated diabetes in mice. *Am J Physiol Regul Integr Comp*  
714 *Physiol* 290: R1728-35, 2006a.
- 715 **Daneshgari F, Liu G, Imrey PB.** Time Dependent Changes in Diabetic Cystopathy in Rats Include  
716 Compensated and Decompensated Bladder Function. *J Urol* 176: 380–386, 2006b.
- 717 **Davies M, Brophy S, Williams R, Taylor A.** The prevalence, severity, and impact of painful diabetic  
718 peripheral neuropathy in type 2 diabetes. *Diabetes Care* 29: 1518–1522, 2006.
- 719 **DCCT Research Group the.** The absence of a glycemic threshold for the development of long-term  
720 complications: the perspective of the Diabetes Control and Complications Trial [Online]. *Diabetes* 45:  
721 1289–1298, 1996. <http://www.ncbi.nlm.nih.gov/pubmed/8826962>.
- 722 **Faerman I, Maler M, Jadzinsky M, Alvarez E, Fox D, Zilbervarg J, Cibeira JB, Colinas R.**  
723 Asymptomatic neurogenic bladder in juvenile diabetics [Online]. *Diabetologia* 7: 168–172, 1971.  
724 <http://www.ncbi.nlm.nih.gov/pubmed/5560918>.
- 725 **Frimodt-Moller C.** Diabetic cystopathy: epidemiology and related disorders [Online]. *Ann Intern Med*  
726 92: 318–321, 1980. <http://www.ncbi.nlm.nih.gov/pubmed/7356221>.
- 727 **Garcia VB, Abbinati MD, Harris-Warrick RM, Schulz DJ.** Effects of chronic spinal cord injury on  
728 relationships among ion channel and receptor mRNAs in mouse lumbar spinal cord. *Neuroscience*  
729 submitted, 2018.
- 730 **Garcia VB, Garcia ML, Schulz DJ.** Quantitative expression profiling in mouse spinal cord reveals  
731 changing relationships among channel and receptor mRNA levels across postnatal maturation.  
732 *Neuroscience* 277: 321–333, 2014.
- 733 **Giachetti A.** The functional state of sympathetic nerves in spontaneously diabetic mice [Online].  
734 *Diabetes* 27: 969–974, 1978. <http://www.ncbi.nlm.nih.gov/pubmed/700260>.
- 735 **Golowasch J, Thomas G, Taylor AL, Patel A, Pineda A, Khalil C, Nadim F.** Membrane capacitance  
736 measurements revisited: dependence of capacitance value on measurement method in nonisopotential  
737 neurons. *J Neurophysiol* 102: 2161–2175, 2009.
- 738 **Grissmer S, Nguyen AN, Aiyar J, Hanson DC, Mather RJ, Gutman GA, Karmilowicz MJ, Auperin**  
739 **DD, Chandy KG.** Pharmacological characterization of five cloned voltage-gated K<sup>+</sup> channels, types  
740 Kv1.1, 1.2, 1.3, 1.5, and 3.1, stably expressed in mammalian cell lines [Online]. *Mol Pharmacol* 45:  
741 1227–1234, 1994. <http://www.ncbi.nlm.nih.gov/pubmed/7517498>.
- 742 **Gunnarsson R.** Function of the pancreatic B-cell during the development of hyperglycaemia in mice



- 743 homozygous for the mutations “diabetes” (db) and “misty” (m) [Online]. *Diabetologia* 11: 431–438,  
744 1975. <http://www.ncbi.nlm.nih.gov/pubmed/1103367>.
- 745 **Hanani M.** Satellite glial cells in sympathetic and parasympathetic ganglia: in search of function. *Brain*  
746 *Res Rev* 64: 304–327, 2010.
- 747 **Hinder LM, O’Brien PD, Hayes JM, Backus C, Solway AP, Sims-Robinson C, Feldman EL.** Dietary  
748 reversal of neuropathy in a murine model of prediabetes and metabolic syndrome. *Dis Model Mech* 10:  
749 717–725, 2017.
- 750 **Hummel KP, Coleman DL, Lane PW.** The influence of genetic background on expression of mutations  
751 at the diabetes locus in the mouse. I. C57BL-KsJ and C57BL-6J strains [Online]. *Biochem Genet* 7: 1–13,  
752 1972. <http://www.ncbi.nlm.nih.gov/pubmed/4557514>.
- 753 **Isom LL, Scheuer T, Brownstein AB, Ragsdale DS, Murphy BJ, Catterall WA.** Functional co-  
754 expression of the beta 1 and type IIA alpha subunits of sodium channels in a mammalian cell line. *J Biol*  
755 *Chem* 270: 3306–12, 1995.
- 756 **Kaplan SA, Te AE, Blaivas JG.** Urodynamic findings in patients with diabetic cystopathy [Online]. *J*  
757 *Urol* 153: 342–344, 1995. <http://www.ncbi.nlm.nih.gov/pubmed/7815578>.
- 758 **Kebapci N, Yenilmez A, Efe B, Entok E, Demirustu C.** Bladder dysfunction in type 2 diabetic patients.  
759 *Neurourol Urodyn* 26: 814–819, 2007.
- 760 **Lee J-H, Kim E-G, Park B-G, Kim K-H, Cha S-K, Kong ID, Lee J-W, Jeong S-W.** Identification of  
761 T-Type  $\alpha_1H$  Ca<sup>2+</sup> Channels (Ca<sub>v</sub> 3.2) in Major Pelvic Ganglion Neurons. *J Neurophysiol* 87: 2844–2850,  
762 2002.
- 763 **Liu PW, Bean BP.** Kv2 channel regulation of action potential repolarization and firing patterns in  
764 superior cervical ganglion neurons and hippocampal CA1 pyramidal neurons. *J Neurosci* 34: 4991–5002,  
765 2014.
- 766 **Liu Y, Sebastian B, Liu B, Zhang Y, Fissel JA, Pan B, Polydefkis M, Farah MH.** Sensory and  
767 autonomic function and structure in footpads of a diabetic mouse model. *Sci Rep* 7: 41401, 2017.
- 768 **Malin SA, Nerbonne JM.** Molecular heterogeneity of the voltage-gated fast transient outward K<sup>+</sup>  
769 current, I(Af), in mammalian neurons [Online]. *J Neurosci* 21: 8004–8014, 2001.  
770 <http://www.ncbi.nlm.nih.gov/pubmed/11588173>.
- 771 **Maser RE, Steenkiste AR, Dorman JS, Nielsen VK, Bass EB, Manjoo Q, Drash AL, Becker DJ,**  
772 **Kuller LH, Greene DA, et al.** Epidemiological correlates of diabetic neuropathy. Report from Pittsburgh  
773 Epidemiology of Diabetes Complications Study [Online]. *Diabetes* 38: 1456–1461, 1989.  
774 <http://www.ncbi.nlm.nih.gov/pubmed/2620781>.
- 775 **Mattingly GE, Fischer VW.** Peripheral neuropathy following prolonged exposure to streptozotocin-  
776 induced diabetes in rats: a teased nerve fiber study [Online]. *Acta Neuropathol* 59: 133–138, 1983.  
777 <http://www.ncbi.nlm.nih.gov/pubmed/6301203>.
- 778 **Medici F, Hawa M, Ianari A, Pyke DA, Leslie RD.** Concordance rate for type II diabetes mellitus in  
779 monozygotic twins: actuarial analysis. *Diabetologia* 42: 146–150, 1999.
- 780 **Metz AE, Jarsky T, Martina M, Spruston N.** R-Type Calcium Channels Contribute to  
781 Afterdepolarization and Bursting in Hippocampal CA1 Pyramidal Neurons [Online]. *J Neurosci* 25, 2005.  
782 <http://www.jneurosci.org/content/25/24/5763/tab-figures-data> [25 Jun. 2018].
- 783 **Nadelhaft I, Vera PL.** Reduced urinary bladder afferent conduction velocities in streptozocin diabetic



- 784 rats [Online]. *Neurosci Lett* 135: 276–278, 1992. <http://www.ncbi.nlm.nih.gov/pubmed/1625809>.
- 785 **Naundorf B, Wolf F, Volgushev M.** Unique features of action potential initiation in cortical neurons.  
786 *Nature* 440: 1060–1063, 2006.
- 787 **Perez-Reyes E.** Molecular Physiology of Low-Voltage-Activated T-type Calcium Channels. *Physiol Rev*  
788 83: 117–161, 2003.
- 789 **Platkiewicz J, Brette R.** A threshold equation for action potential initiation. *PLoS Comput Biol* 6:  
790 e1000850, 2010.
- 791 **Platkiewicz J, Brette R.** Impact of fast sodium channel inactivation on spike threshold dynamics and  
792 synaptic integration. *PLoS Comput Biol* 7: e1001129, 2011.
- 793 **Rudy B, McBain CJ.** Kv3 channels: voltage-gated K<sup>+</sup> channels designed for high-frequency repetitive  
794 firing [Online]. *Trends Neurosci* 24: 517–526, 2001. <http://www.ncbi.nlm.nih.gov/pubmed/11506885>.
- 795 **Sasaki K, Chancellor MB, Goins WF, Phelan MW, Glorioso JC, de Groat WC, Yoshimura N.** Gene  
796 therapy using replication-defective herpes simplex virus vectors expressing nerve growth factor in a rat  
797 model of diabetic cystopathy [Online]. *Diabetes* 53: 2723–2730, 2004.  
798 <http://www.ncbi.nlm.nih.gov/pubmed/15448108>.
- 799 **Sasaki K, Chancellor MB, Phelan MW, Yokoyama T, Fraser MO, Seki S, Kubo K, Kumon H,**  
800 **Groat WC, Yoshimura N.** Diabetic cystopathy correlates with a long-term decrease in nerve growth  
801 factor levels in the bladder and lumbosacral dorsal root Ganglia. *J Urol* 168: 1259–1264, 2002.
- 802 **Springer MG, Kullmann PH, Horn JP.** Virtual leak channels modulate firing dynamics and synaptic  
803 integration in rat sympathetic neurons: implications for ganglionic transmission in vivo. *J Physiol* 593:  
804 803–823, 2015.
- 805 **Sullivan KA, Hayes JM, Wiggin TD, Backus C, Su Oh S, Lentz SI, Brosius 3rd F, Feldman EL.**  
806 Mouse models of diabetic neuropathy. *Neurobiol Dis* 28: 276–285, 2007.
- 807 **Suzuki S, Rogawski MA.** T-type calcium channels mediate the transition between tonic and phasic firing  
808 in thalamic neurons [Online]. *Proc Natl Acad Sci U S A* 86: 7228–7232, 1989.  
809 <http://www.ncbi.nlm.nih.gov/pubmed/2550936>.
- 810 **Tompkins JD, Vizzard MA, Parsons RL.** Synaptic transmission at parasympathetic neurons of the  
811 major pelvic ganglion from normal and diabetic male mice. *J Neurophysiol* 109: 988–995, 2013.
- 812 **UKPDS.** Intensive blood-glucose control with sulphonylureas or insulin compared with conventional  
813 treatment and risk of complications in patients with type 2 diabetes (UKPDS 33). UK Prospective  
814 Diabetes Study (UKPDS) Group [Online]. *Lancet* 352: 837–853, 1998.  
815 <http://www.ncbi.nlm.nih.gov/pubmed/9742976>.
- 816 **United States. Department of Health and Human Services., Center for Disease Control., National**  
817 **Center for Health Statistics (U.S.).** Health, United States, 2016 : with chartbook on Long-term Trends in  
818 Health [Online]. Hyattsville, MD: National Center for Health Statistics.  
819 <https://www.cdc.gov/nchs/data/hsr/hsr16.pdf>.
- 820 **Vacher H, Mohapatra DP, Trimmer JS.** Localization and Targeting of Voltage-Dependent Ion  
821 Channels in Mammalian Central Neurons. *Physiol Rev* 88: 1407–1447, 2008.
- 822 **Vandesompele J, De Preter K, Pattyn I, Poppe B, Van Roy N, De Paepe A, Speleman R.** Accurate  
823 normalization of real-time quantitative RT-PCR data by geometric averaging of multiple internal control  
824 genes. *Genome Biol* 3: research0034.1–0034.11, 2002.

- 825 **Vinik AI, Maser RE, Mitchell BD, Freeman R.** Diabetic autonomic neuropathy [Online]. *Diabetes*  
826 *Care* 26: 1553–1579, 2003. <http://www.ncbi.nlm.nih.gov/pubmed/12716821>.
- 827 **Vinik AI, Maser RE, Ziegler D.** Autonomic imbalance: prophet of doom or scope for hope? *Diabet Med*  
828 28: 643–651, 2011.
- 829 **Wang B, Chandrasekera PC, Pippin JJ.** Leptin- and leptin receptor-deficient rodent models: relevance  
830 for human type 2 diabetes [Online]. *Curr Diabetes Rev* 10: 131–145, 2014.  
831 <http://www.ncbi.nlm.nih.gov/pubmed/24809394>.
- 832 **Weiser M, Vega-Saenz de Miera E, Kentros C, Moreno H, Franzen L, Hillman D, Baker H, Rudy**  
833 **B.** Differential expression of Shaw-related K<sup>+</sup> channels in the rat central nervous system [Online]. *J*  
834 *Neurosci* 14: 949–972, 1994. <http://www.ncbi.nlm.nih.gov/pubmed/8120636>.
- 835 **White WE, Hooper SL.** Contamination of current-clamp measurement of neuron capacitance by voltage-  
836 dependent phenomena. *J Neurophysiol* 110: 257–268, 2013.
- 837 **Won YJ, Whang K, Kong ID, Park KS, Lee JW, Jeong SW.** Expression profiles of high voltage-  
838 activated calcium channels in sympathetic and parasympathetic pelvic ganglion neurons innervating the  
839 urogenital system. *J Pharmacol Exp Ther* 317: 1064–1071, 2006.
- 840 **Yuan Z, Tang Z, He C, Tang W.** Diabetic cystopathy: A review. *J Diabetes* 7: 442–447, 2015.
- 841
- 842

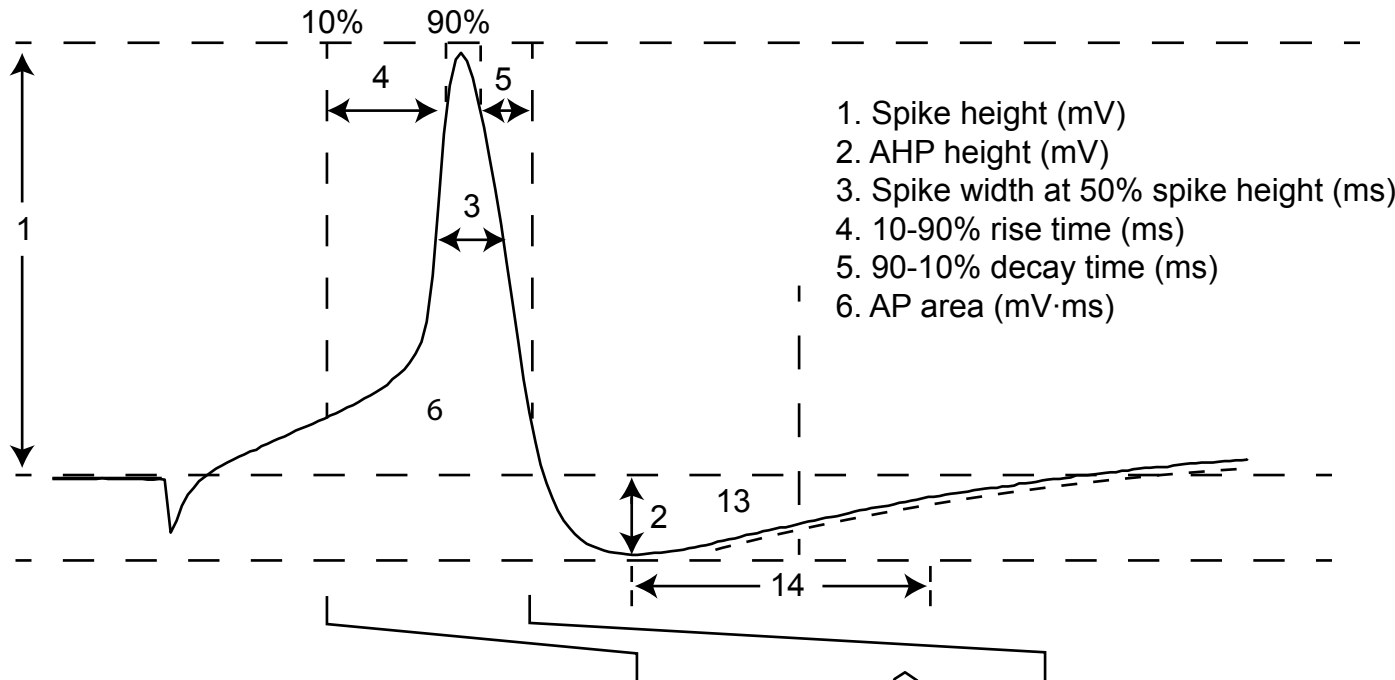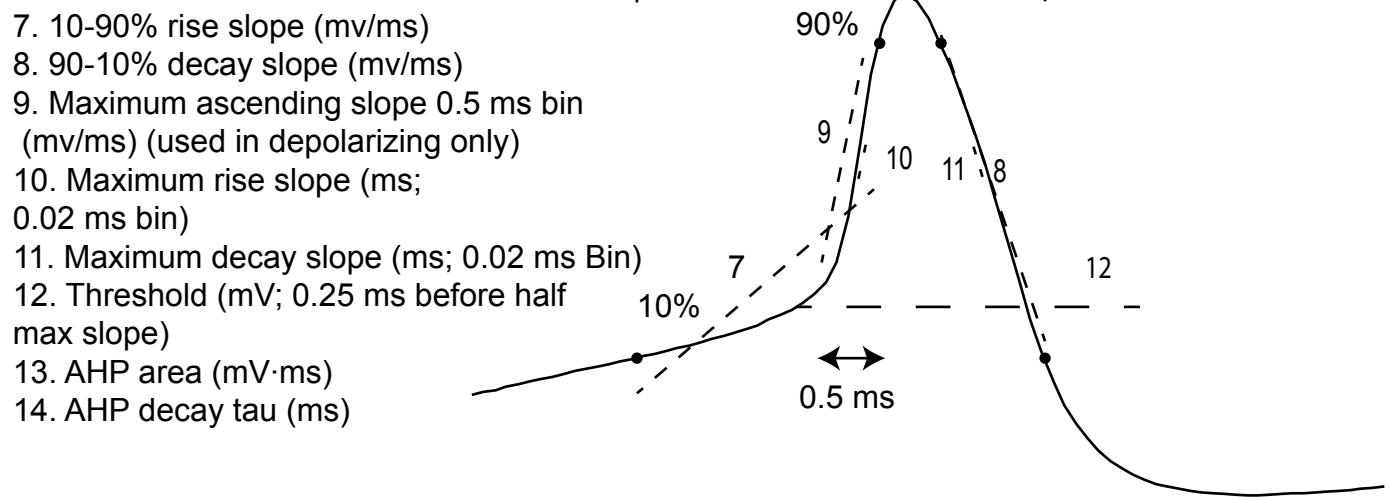

**A****Weight**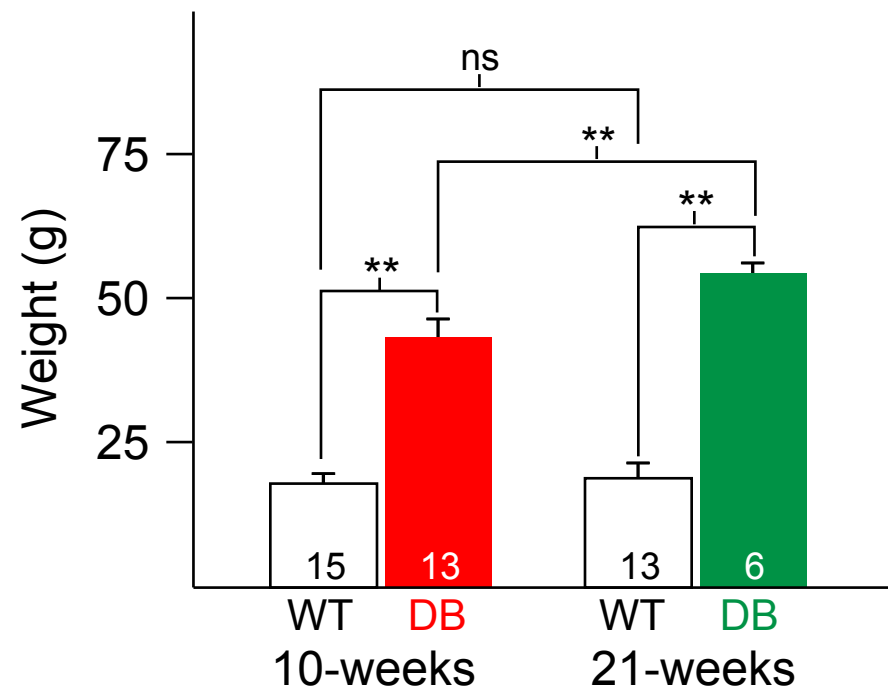**B****Fasting Blood Glucose**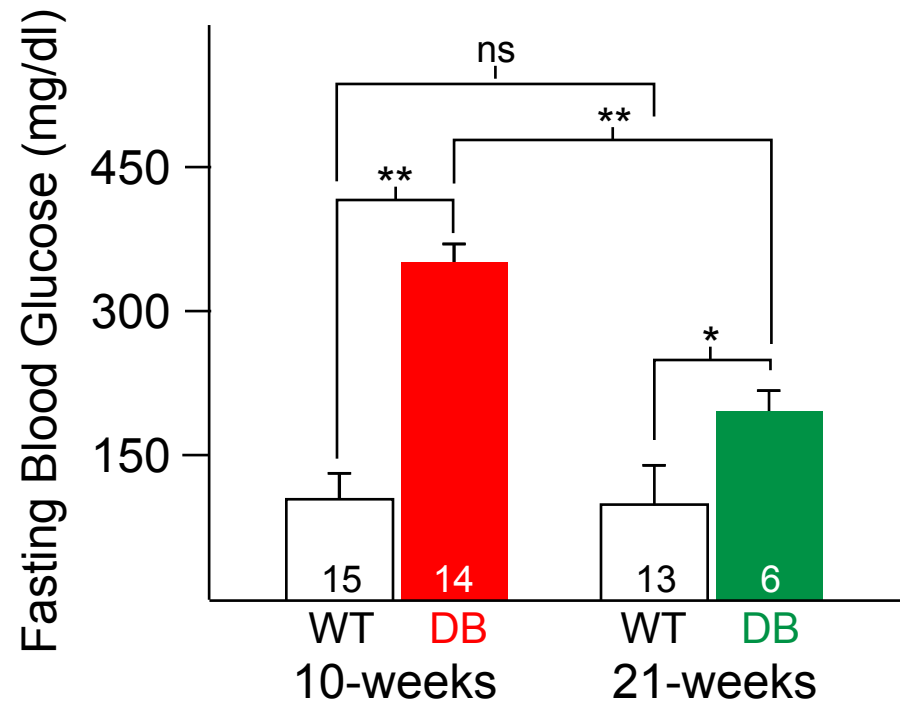**C****Fasting Serum Insulin**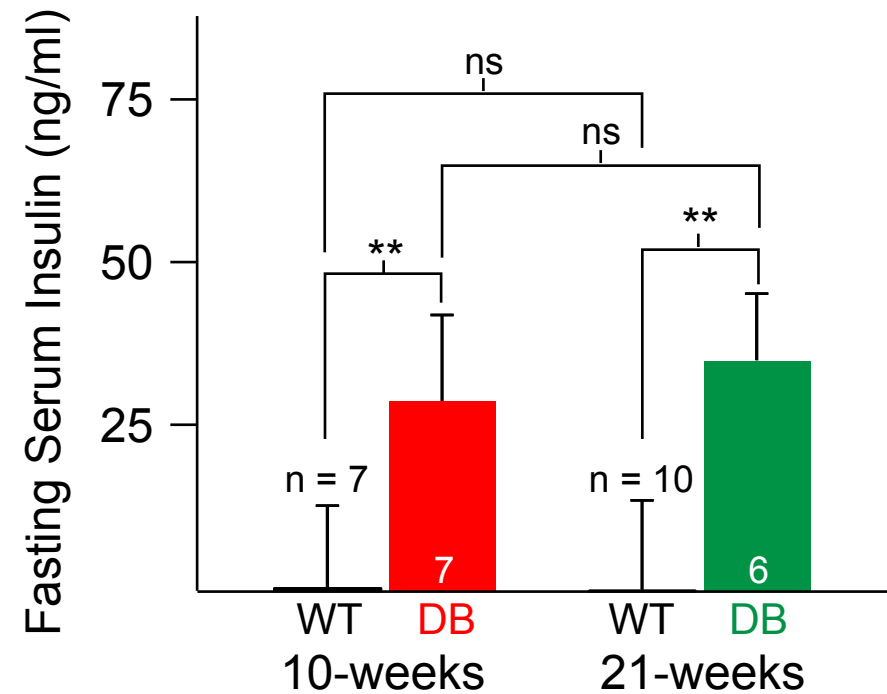

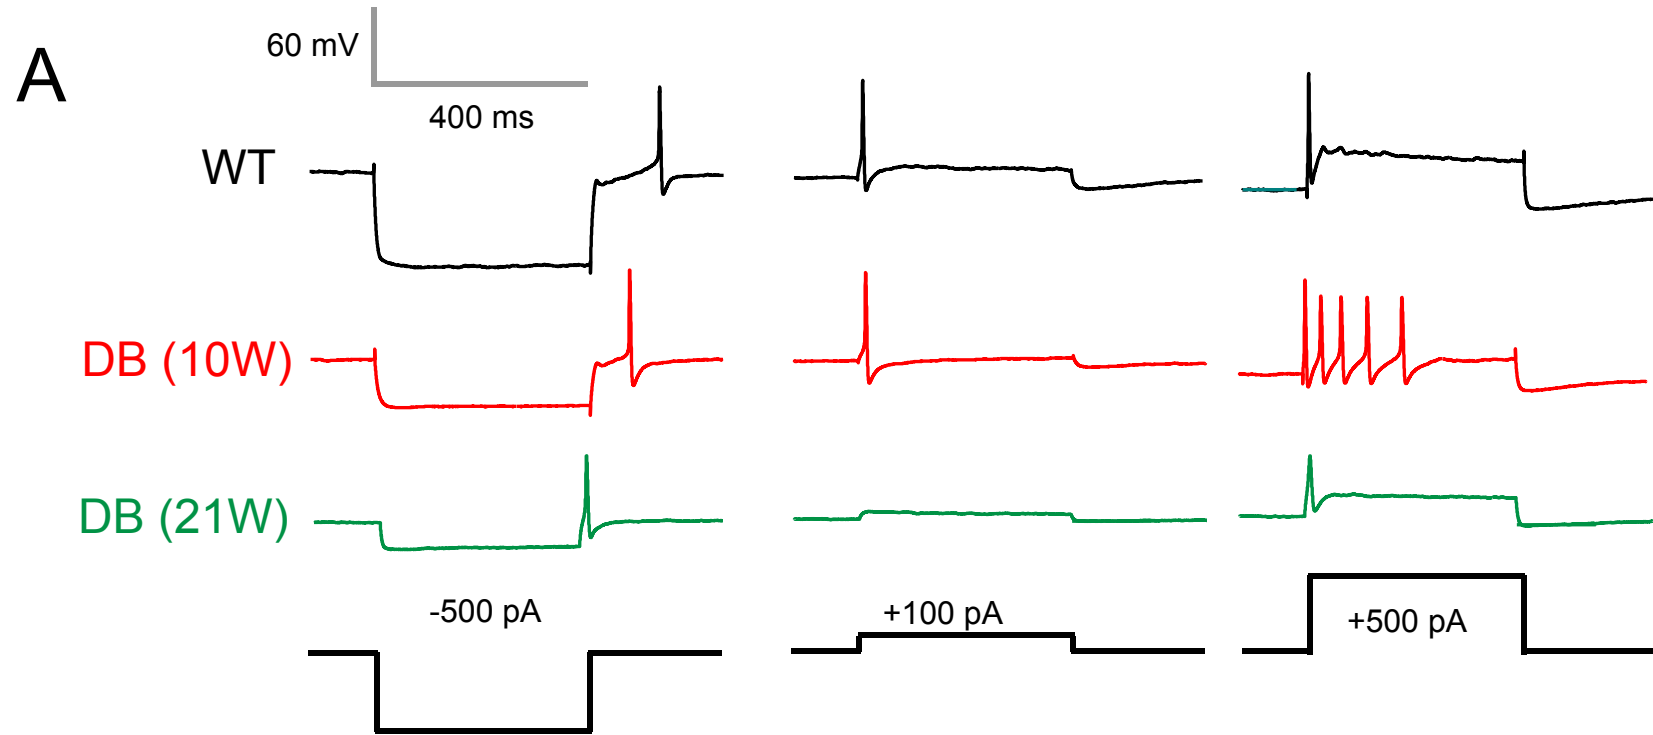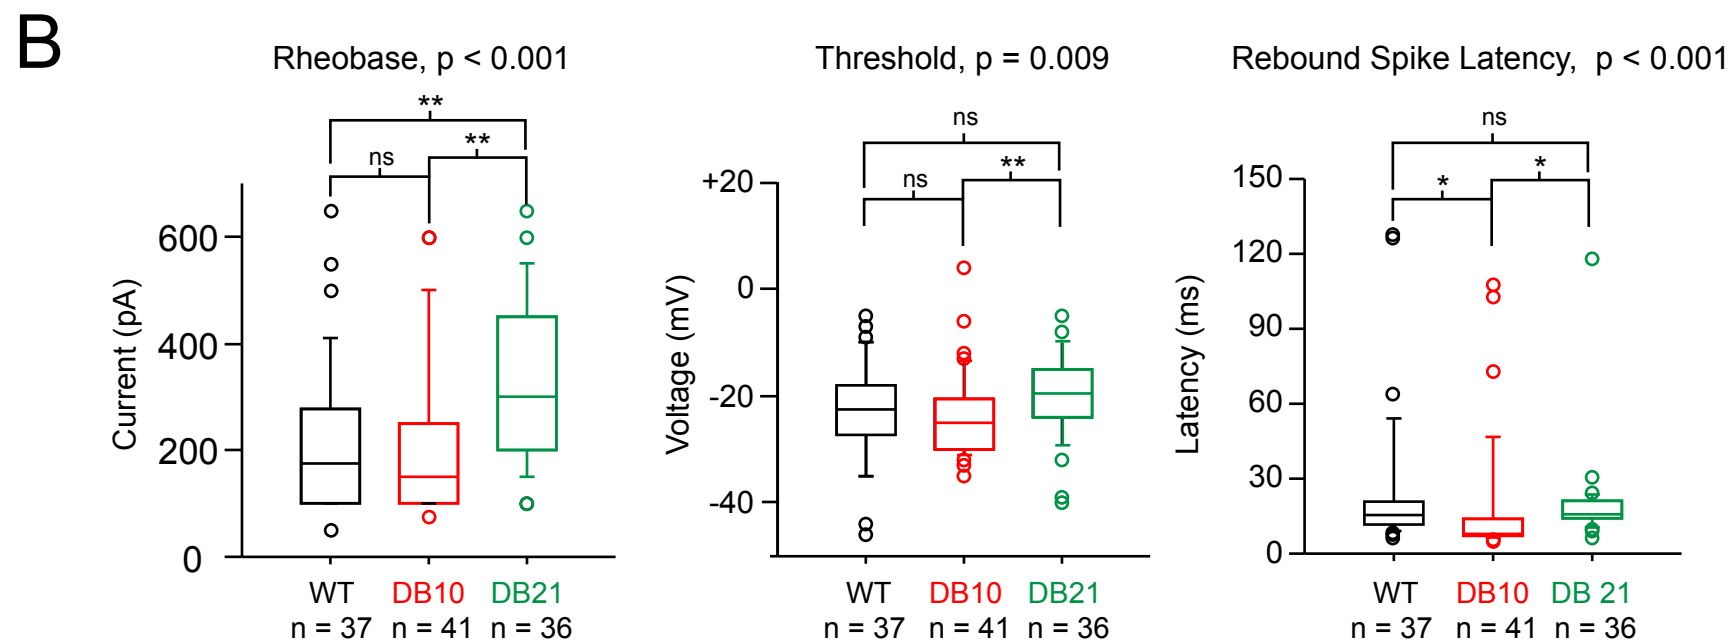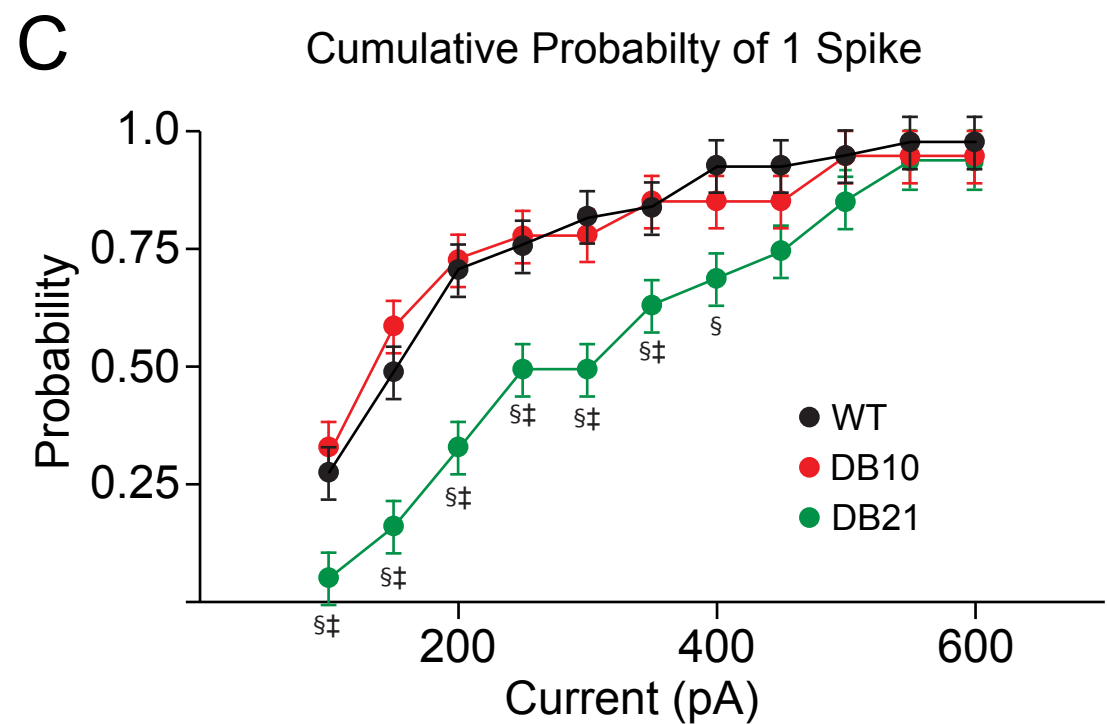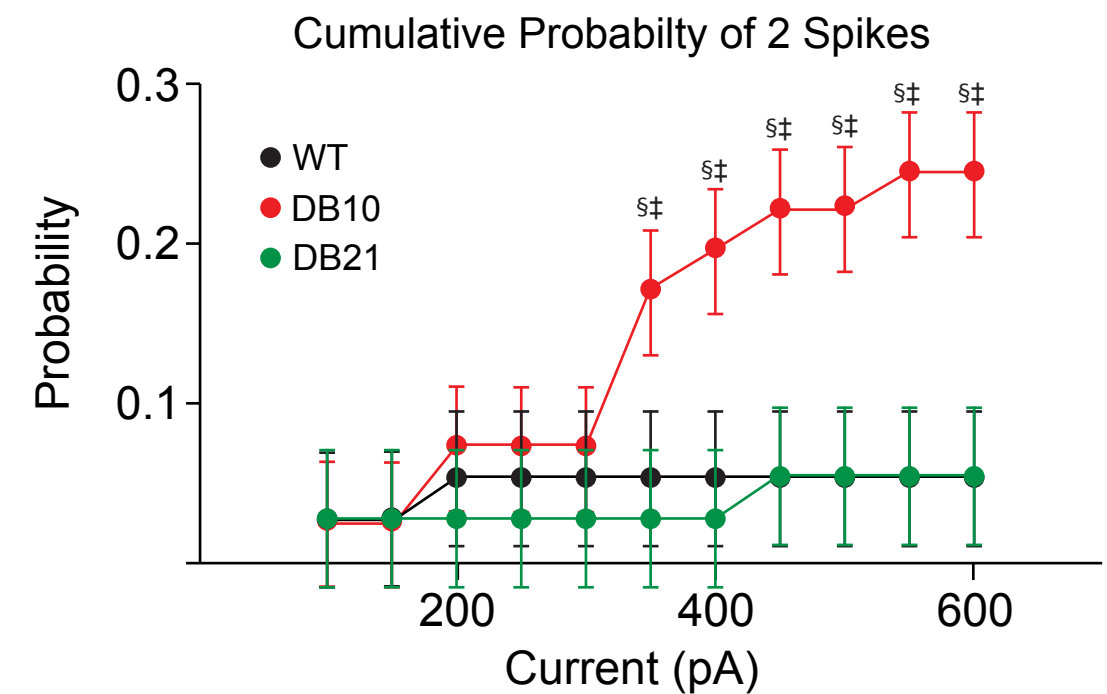

**A**Resting Membrane Potential,  $p = 0.365$ 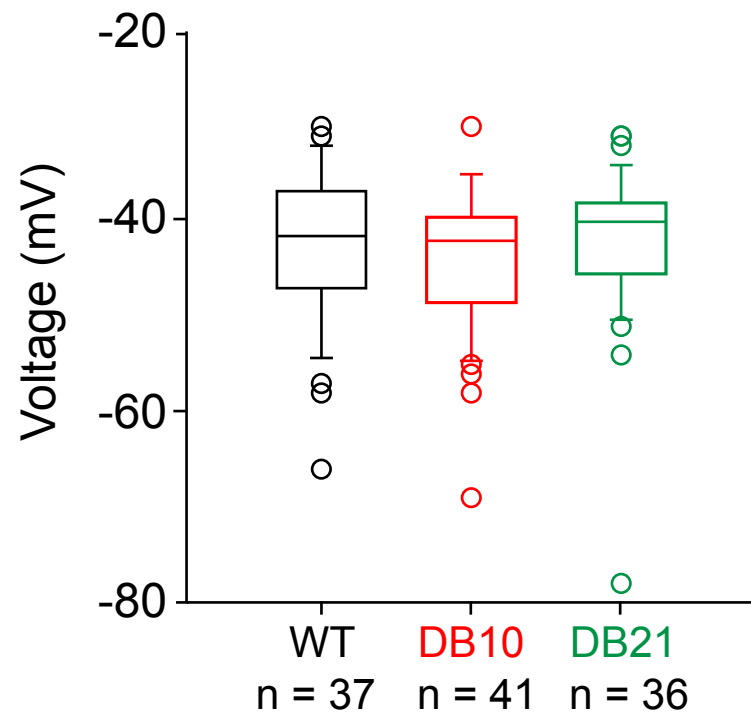**B** $R_{in}$ ,  $p = 0.005$ 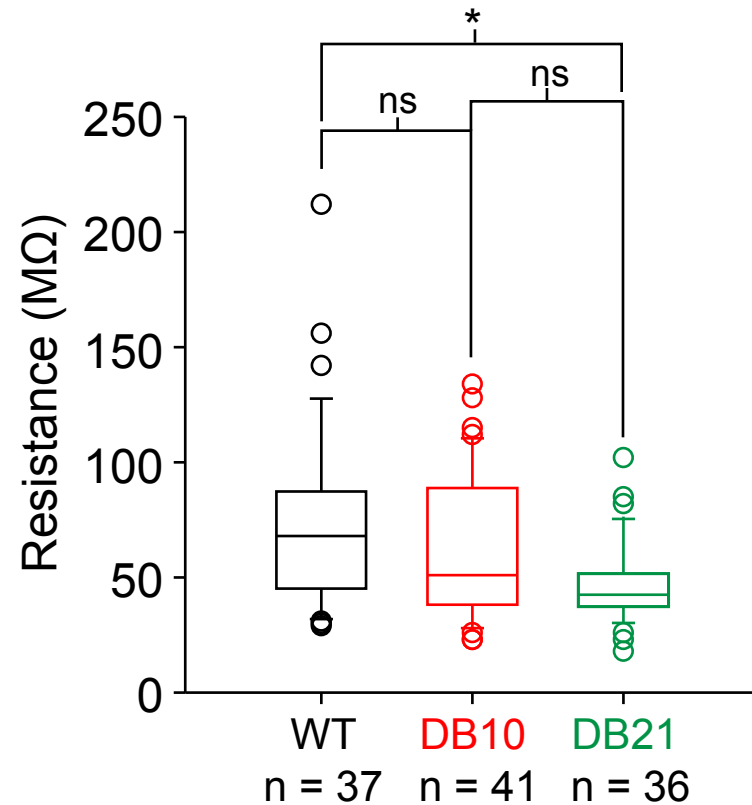**C**Tau,  $p = 0.033$ 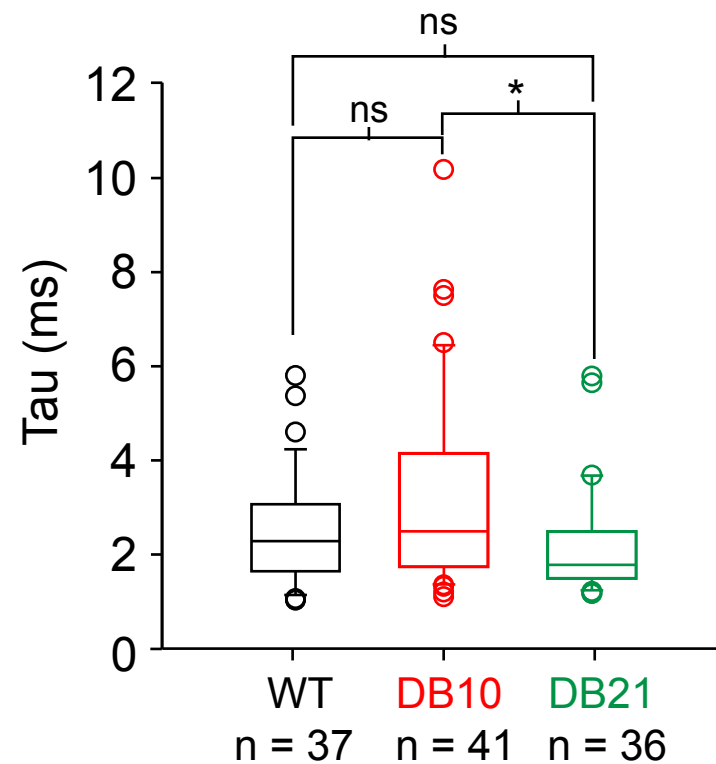**D**Capacitance,  $p < 0.001$ 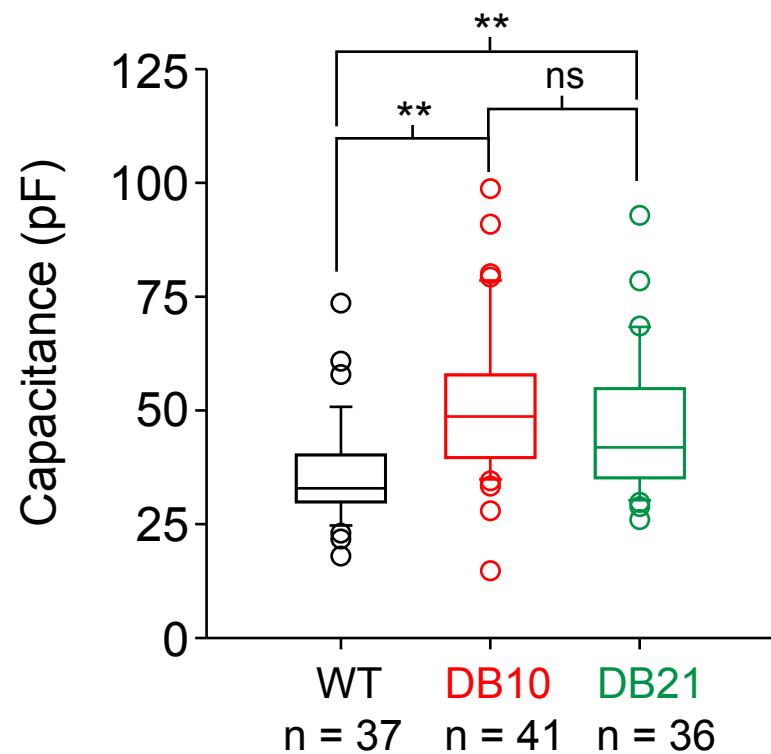

**A** Spike Slope Ascending (depolarizing),  $p < 0.001$

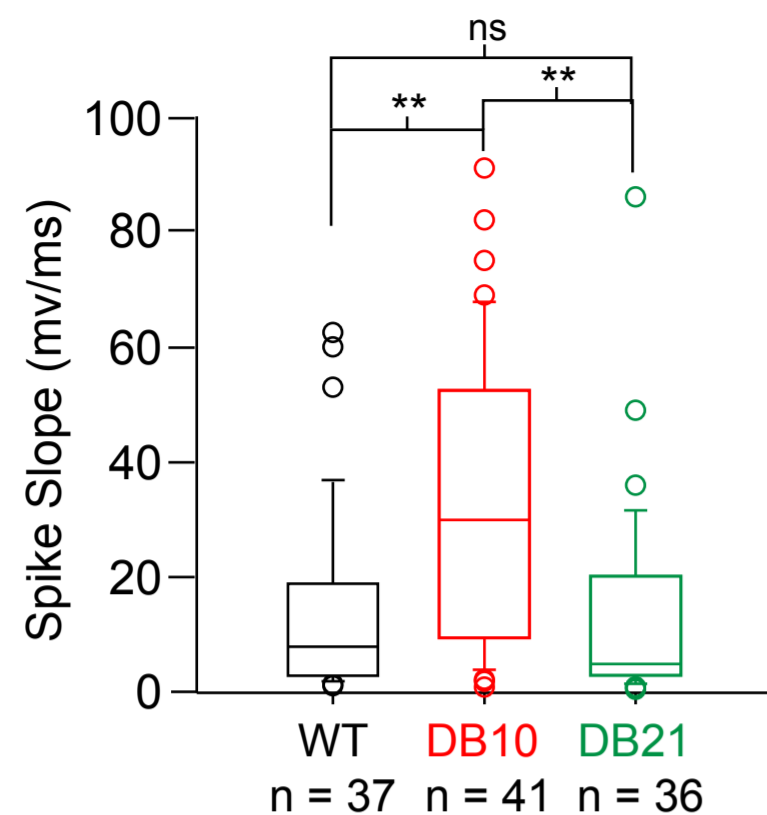

**B** Half-Width,  $p < 0.001$

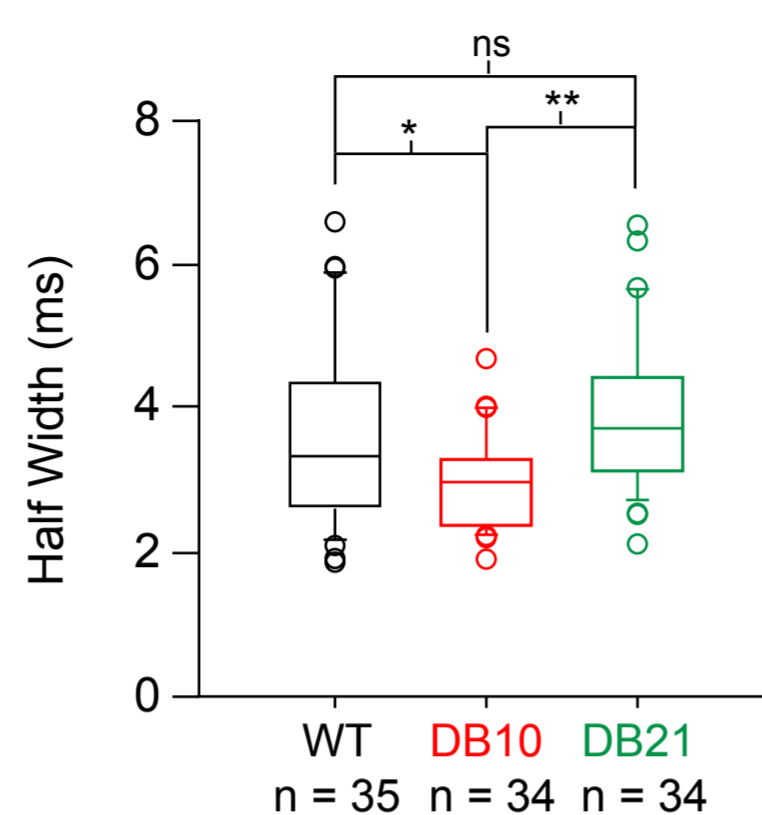

**C** Max Rise Slope (rebound),  $p = 0.059$

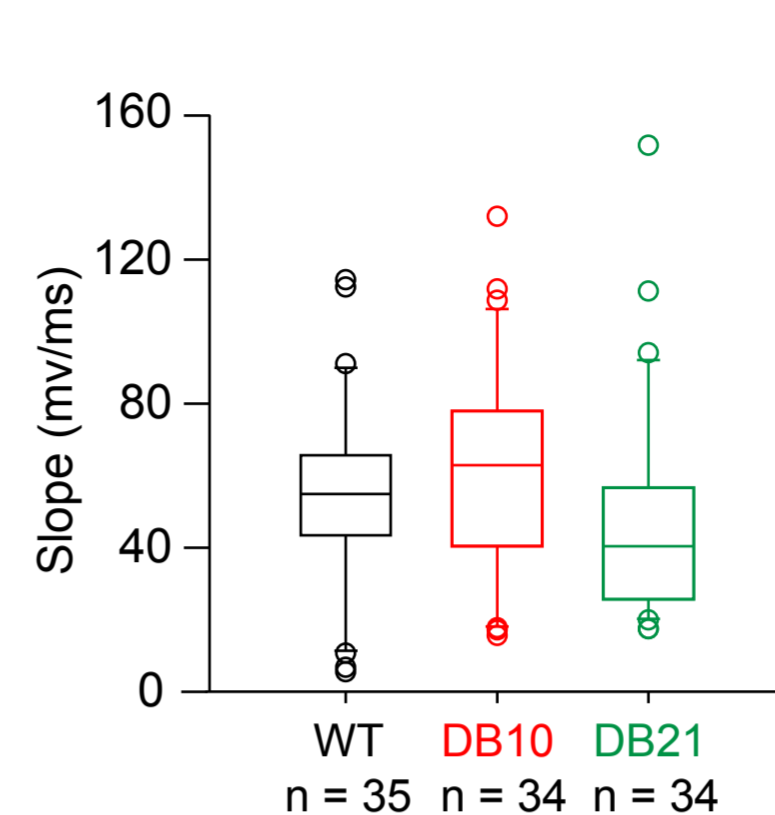

**D** Max Decay Slope (Rebound),  $p = 0.016$

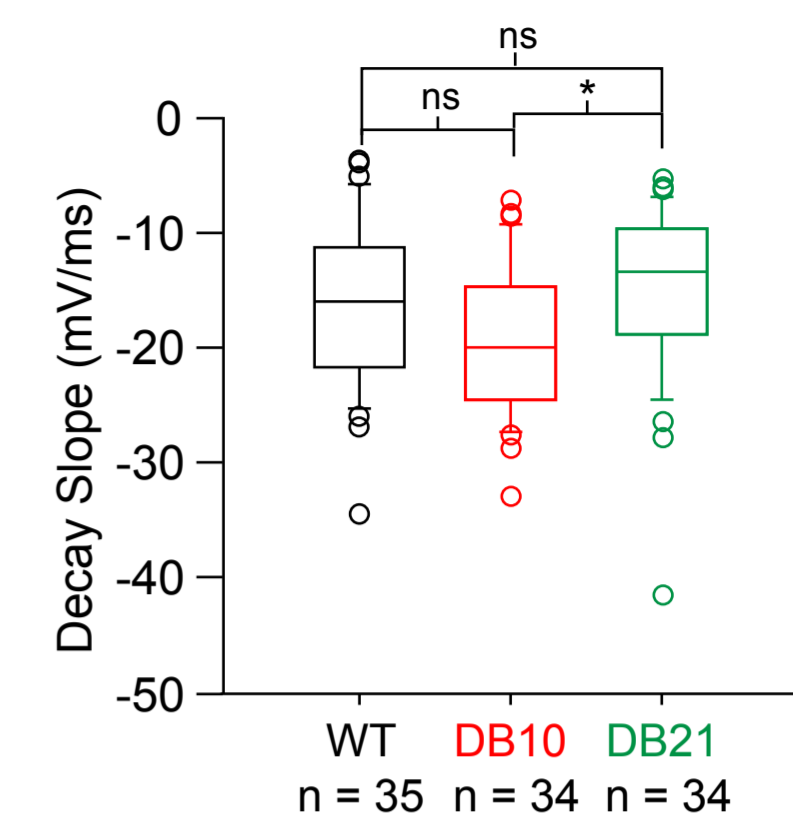

bioRxiv preprint doi: <https://doi.org/10.1101/360826>; this version posted July 4, 2018. The copyright holder for this preprint (which was not certified by peer review) is the author/funder, who has granted bioRxiv a license to display the preprint in perpetuity. It is made available under aCC-BY-NC-ND 4.0 International license.

**E** 10-90% Rise Time,  $p = 0.039$

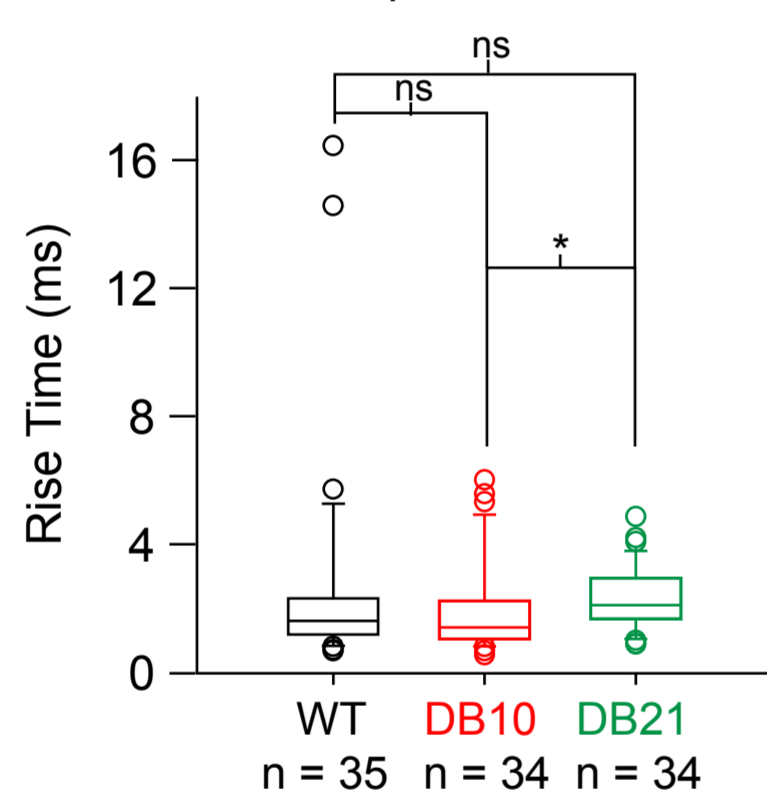

**F** 90-10% Decay time,  $p < 0.001$

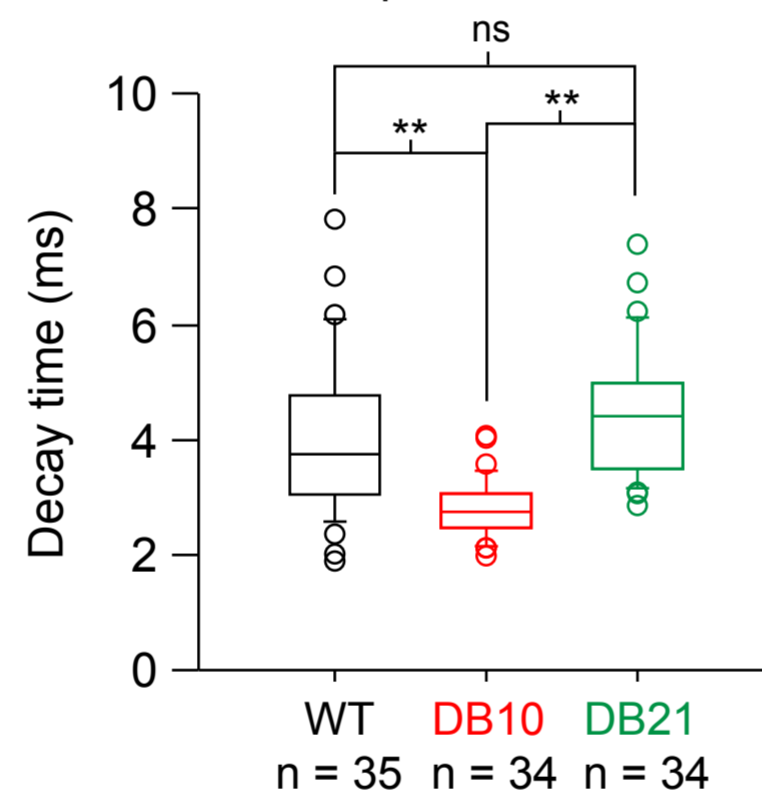

**G** 10-90% Rise Slope,  $p = 0.360$

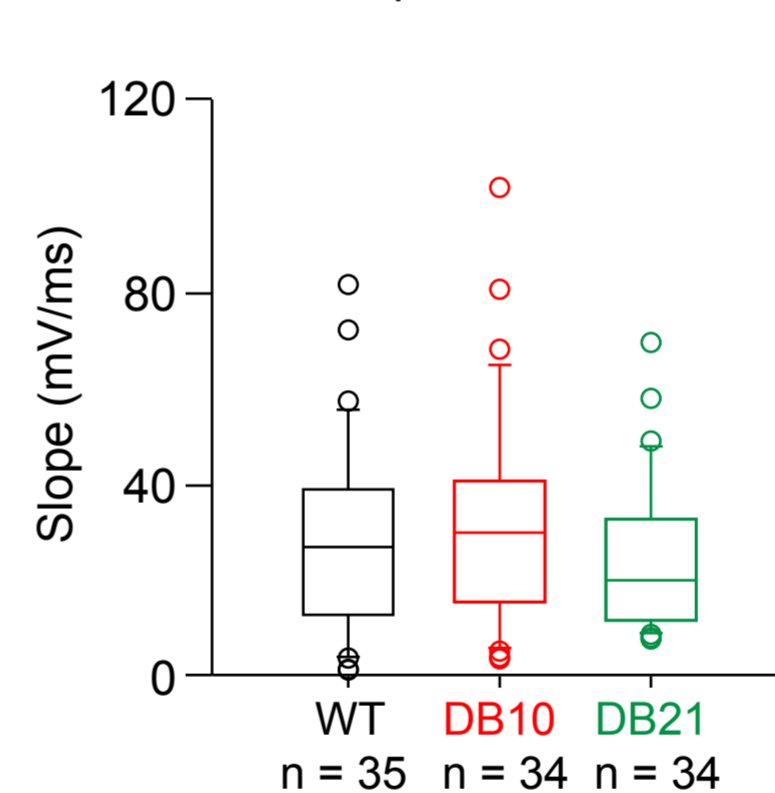

**H** 90-10% Decay slope,  $p < 0.001$

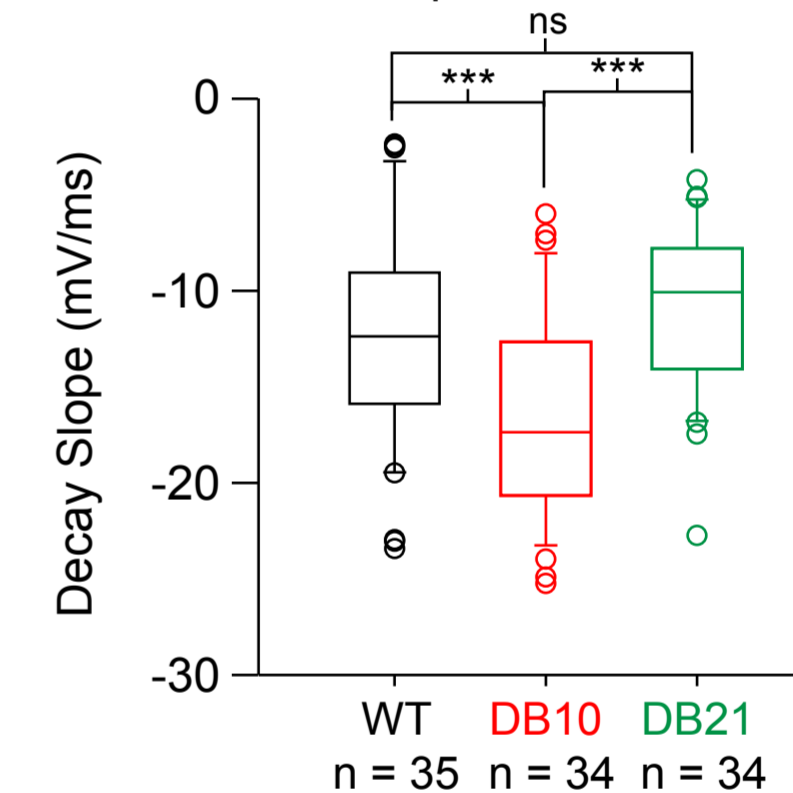

**I** AP Area,  $p = 0.002$

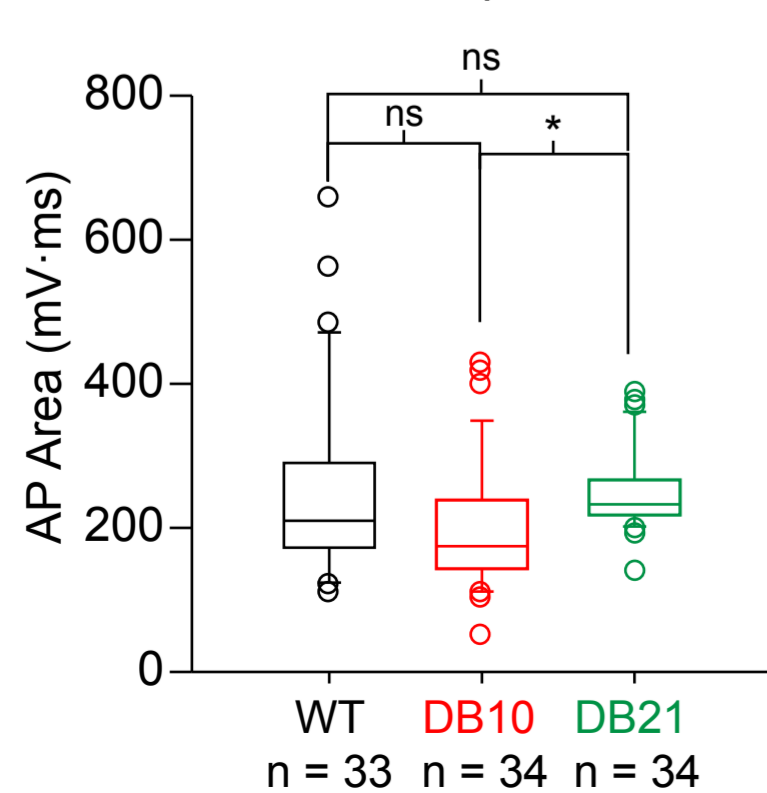

**J** AHP Area,  $p = 0.767$

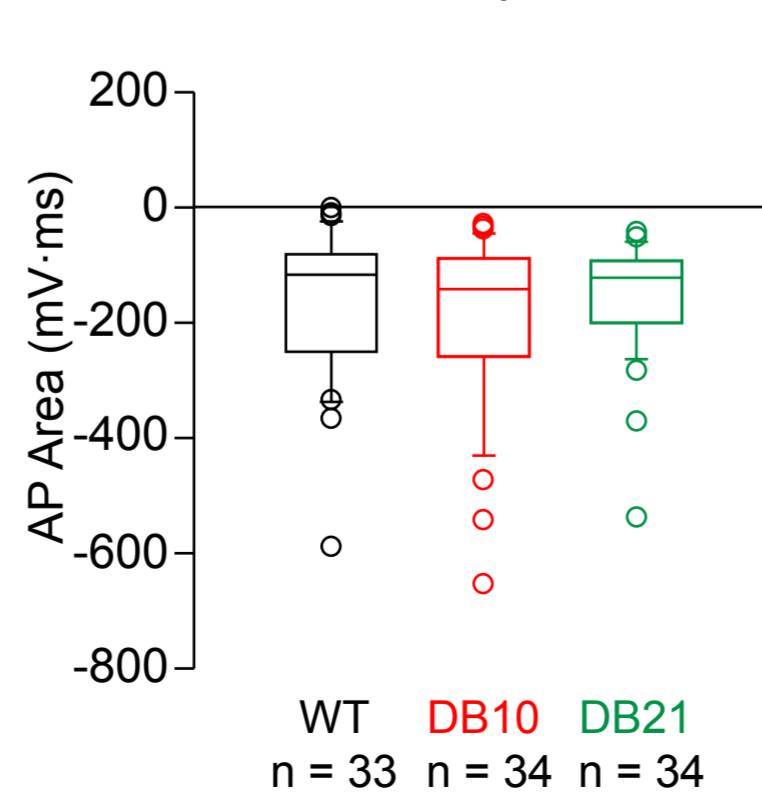

**K** AHP Amplitude,  $p = 0.235$

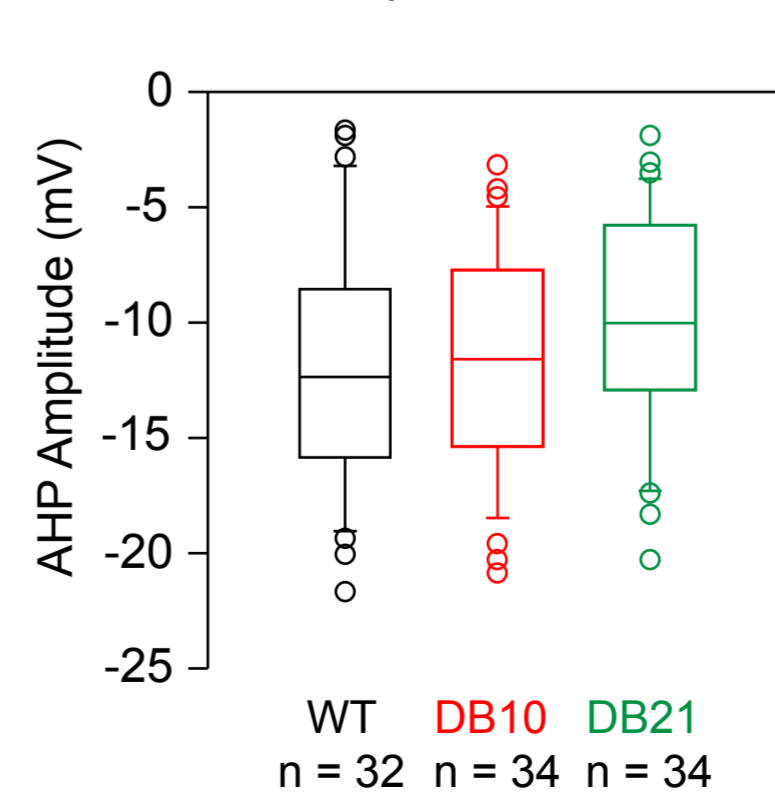

**L** AHP Tau,  $p = 0.003$

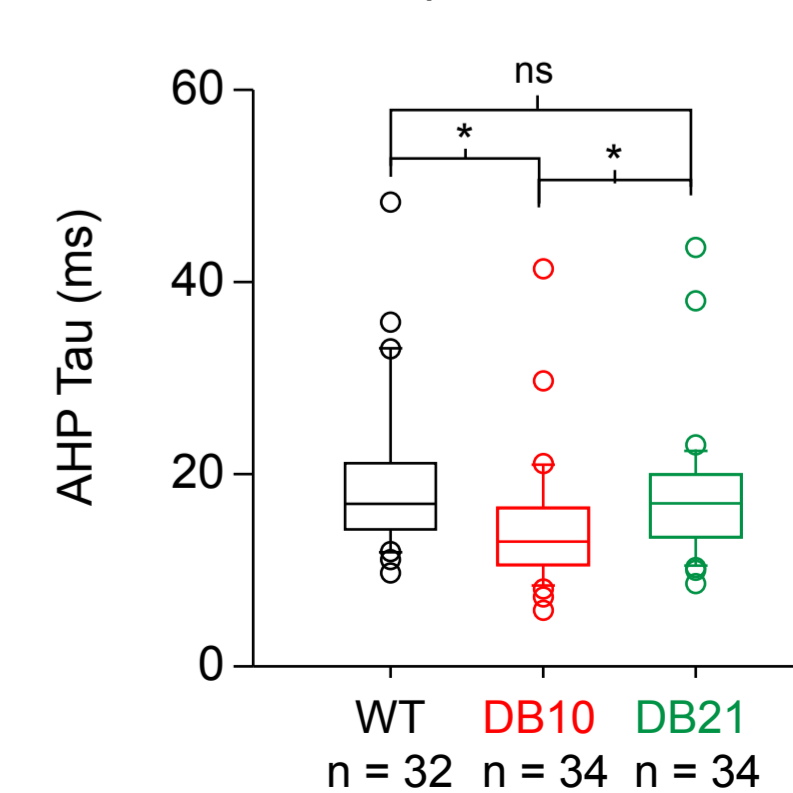



## Calcium Channels

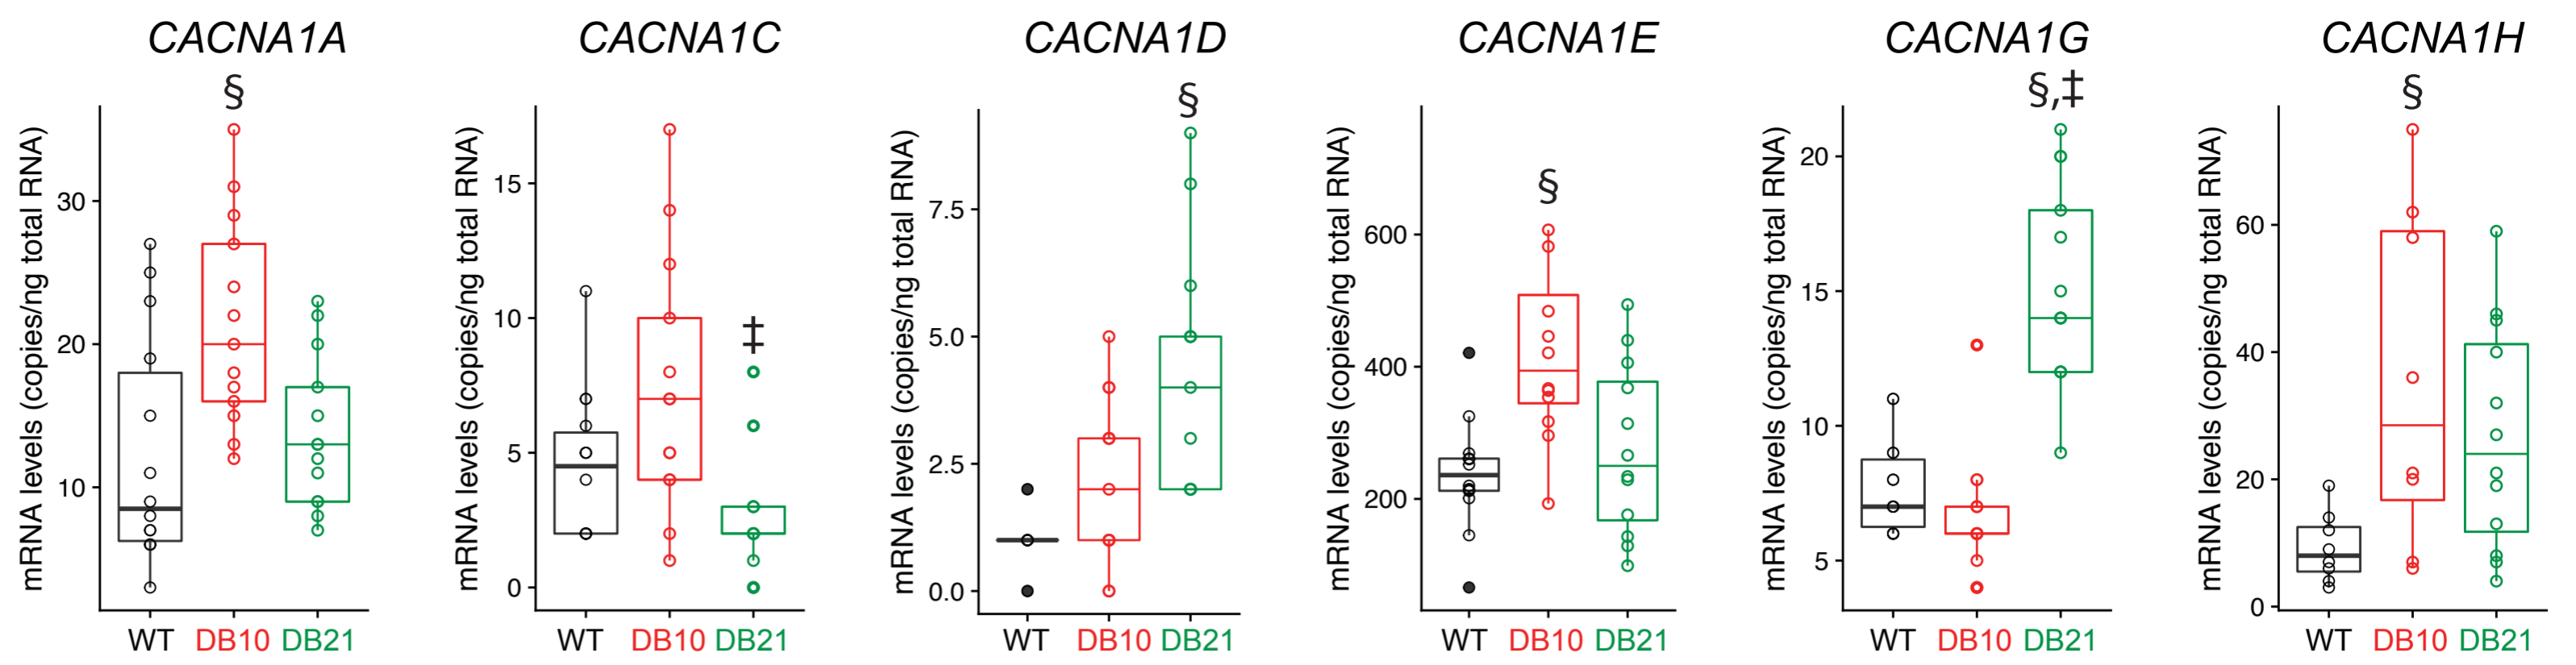

## Sodium Channels

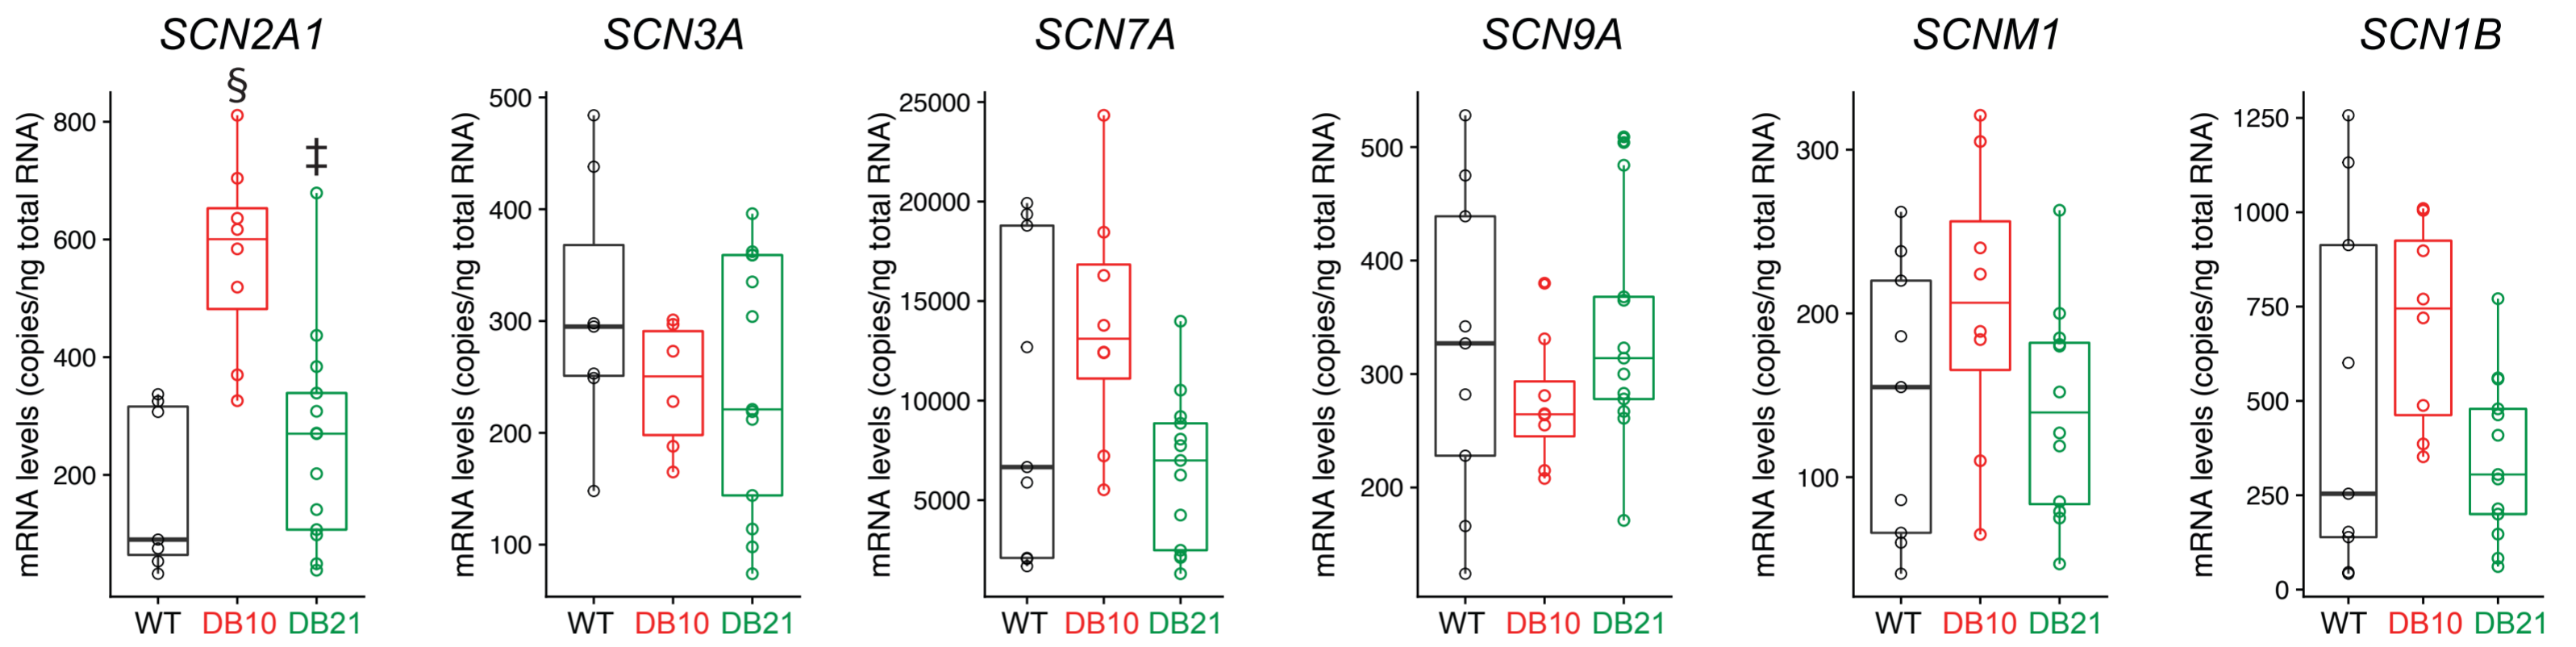

## Potassium Channels

bioRxiv preprint doi: <https://doi.org/10.1101/360826>; this version posted July 4, 2018. The copyright holder for this preprint (which was not certified by peer review) is the author/funder, who has granted bioRxiv a license to display the preprint in perpetuity. It is made available under aCC-BY-NC-ND 4.0 International license.

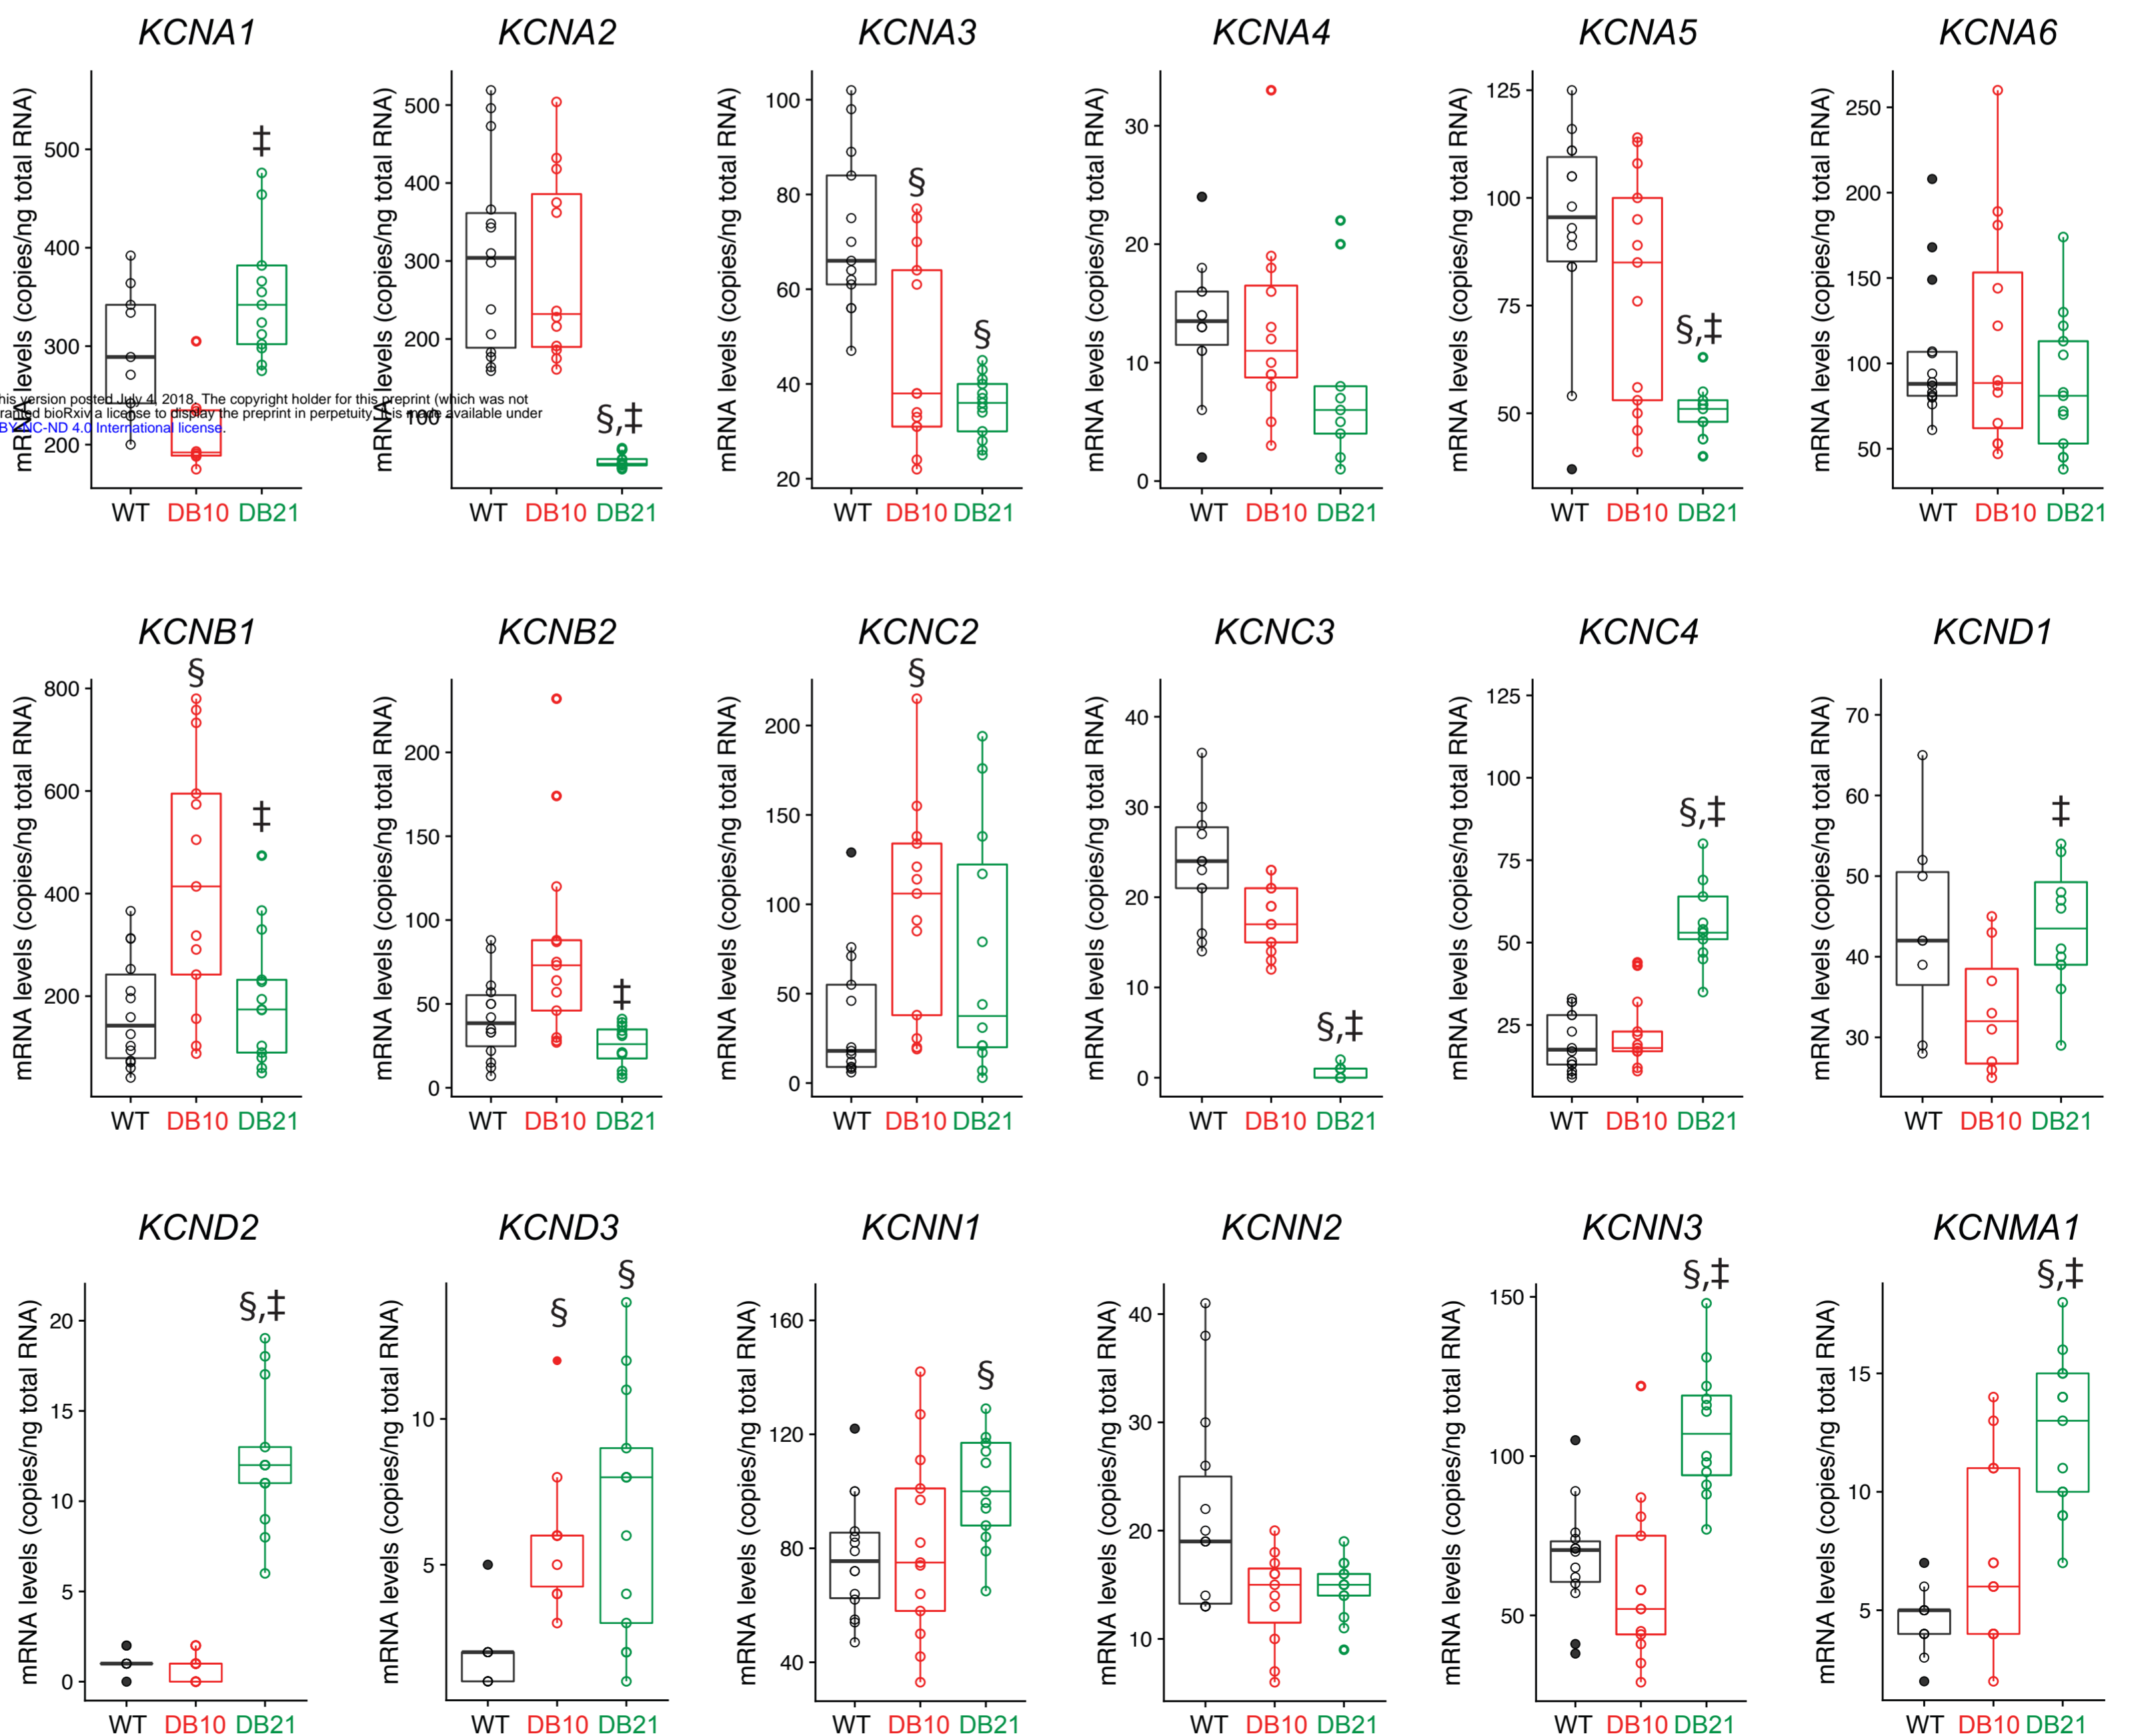

§ = diff from Control  
‡ = DB10 diff from DB21



A.

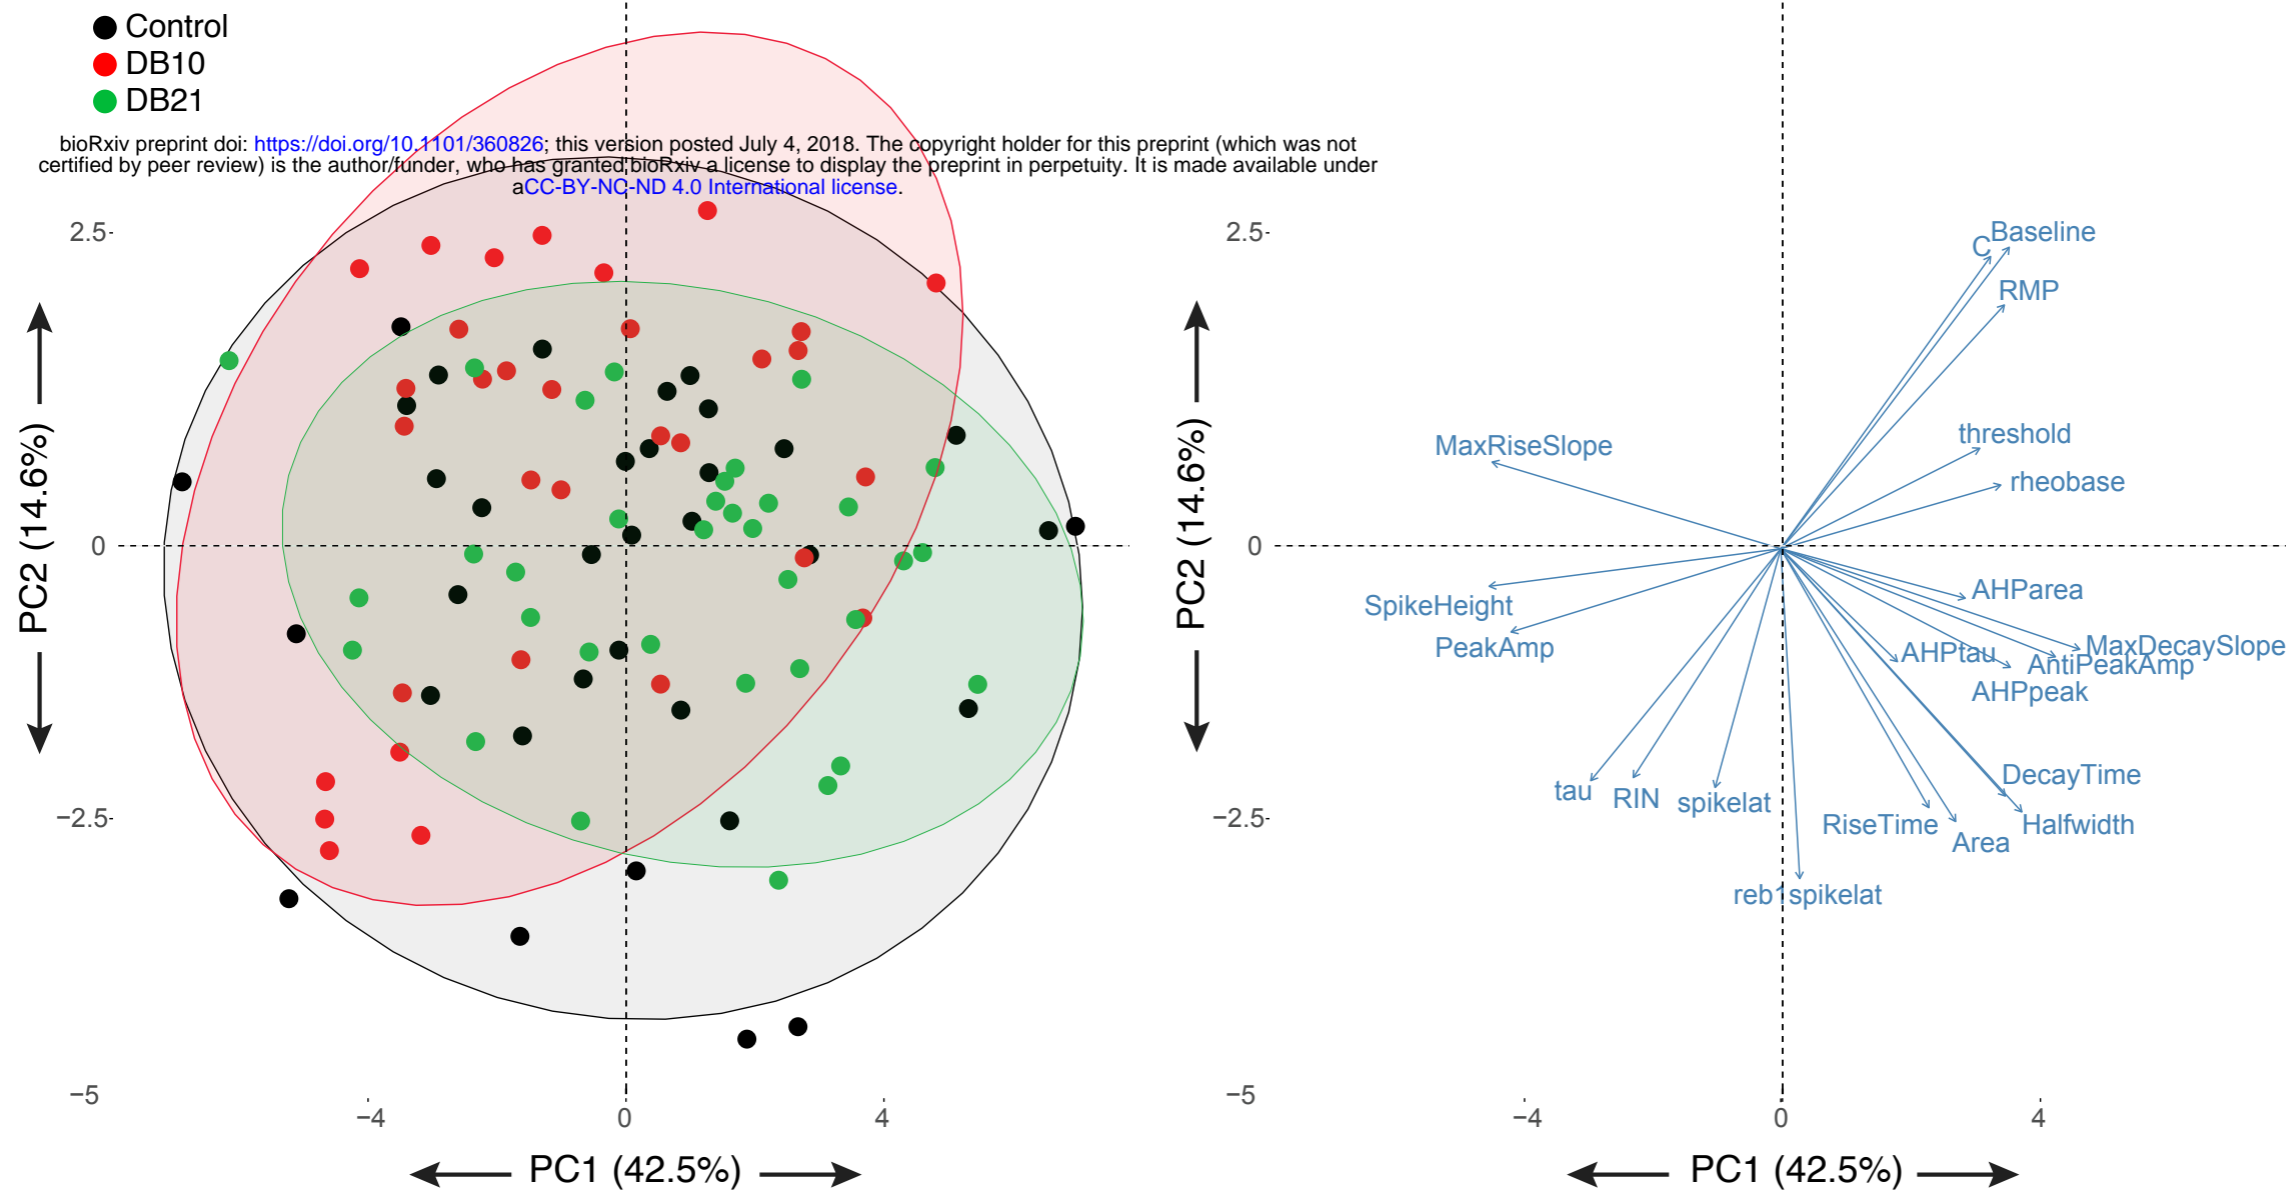

B.

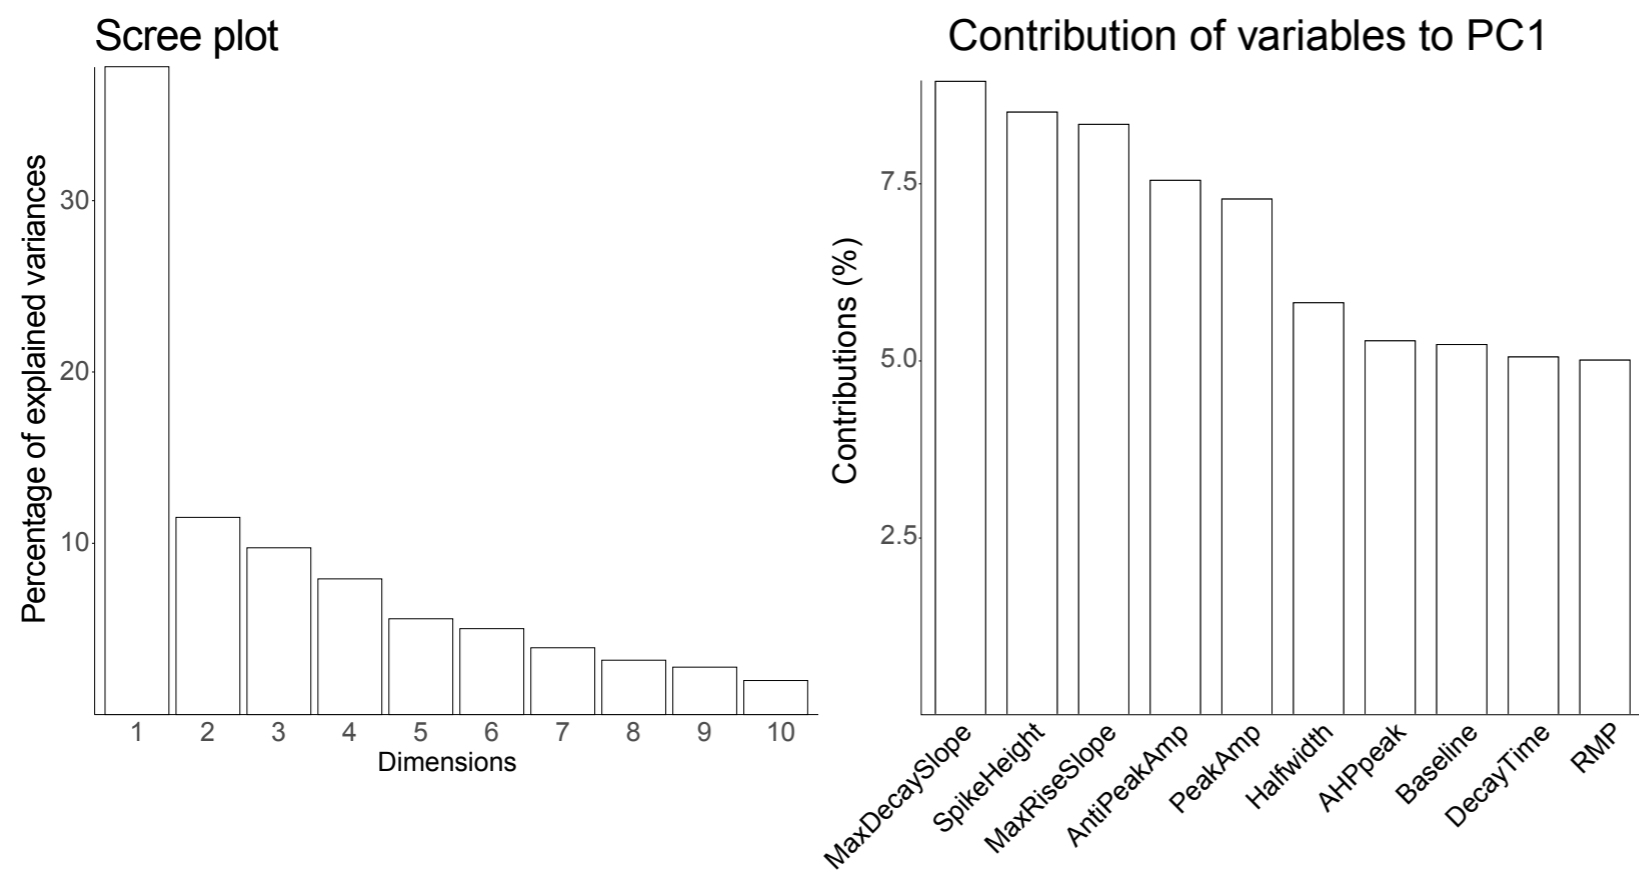

A.

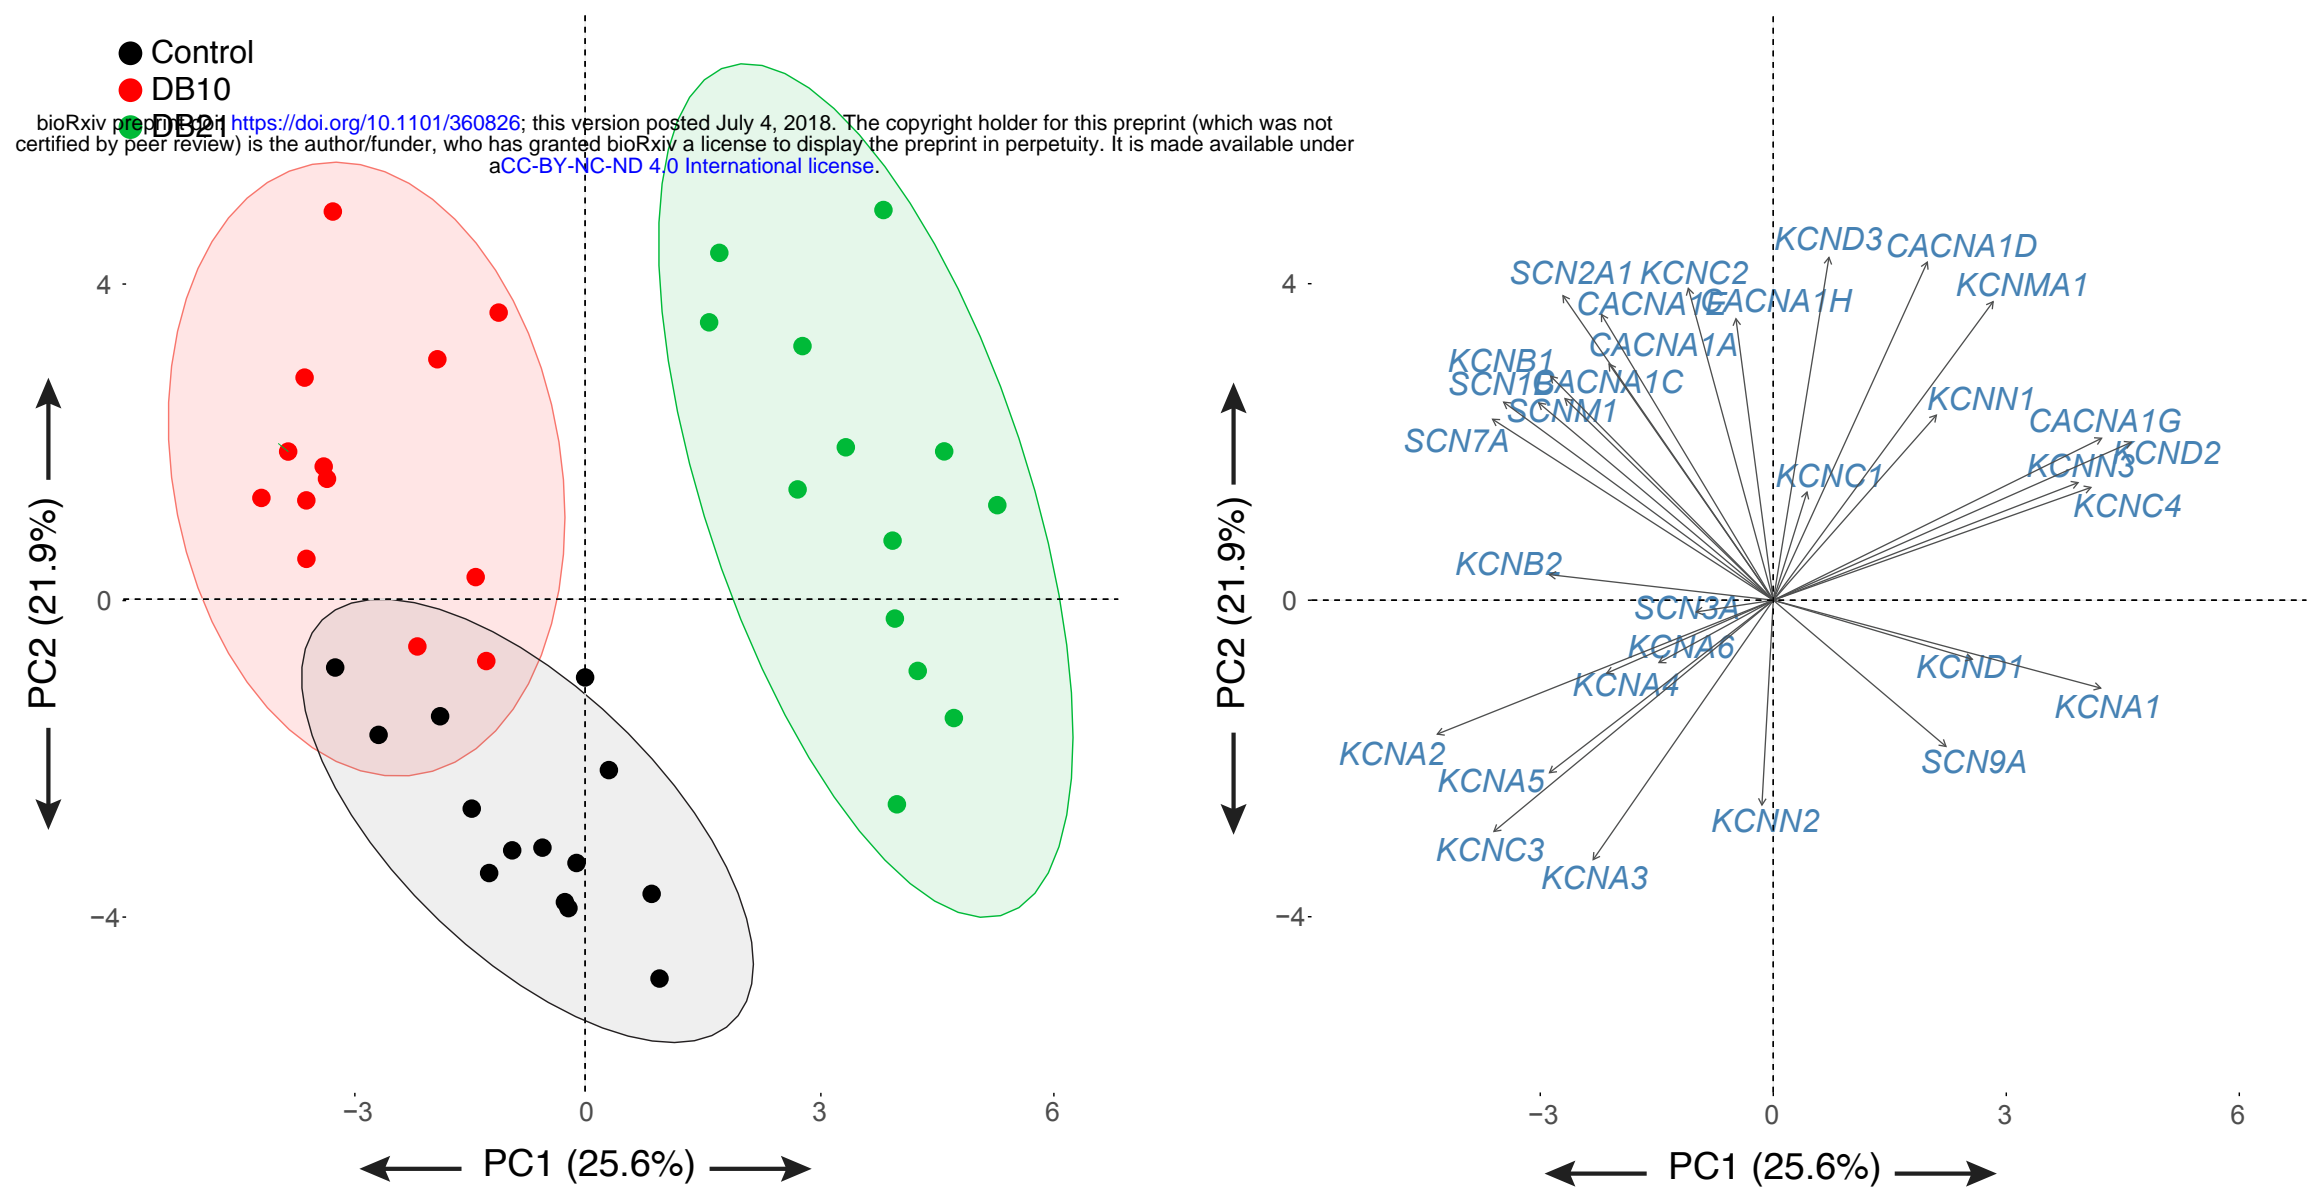

B.

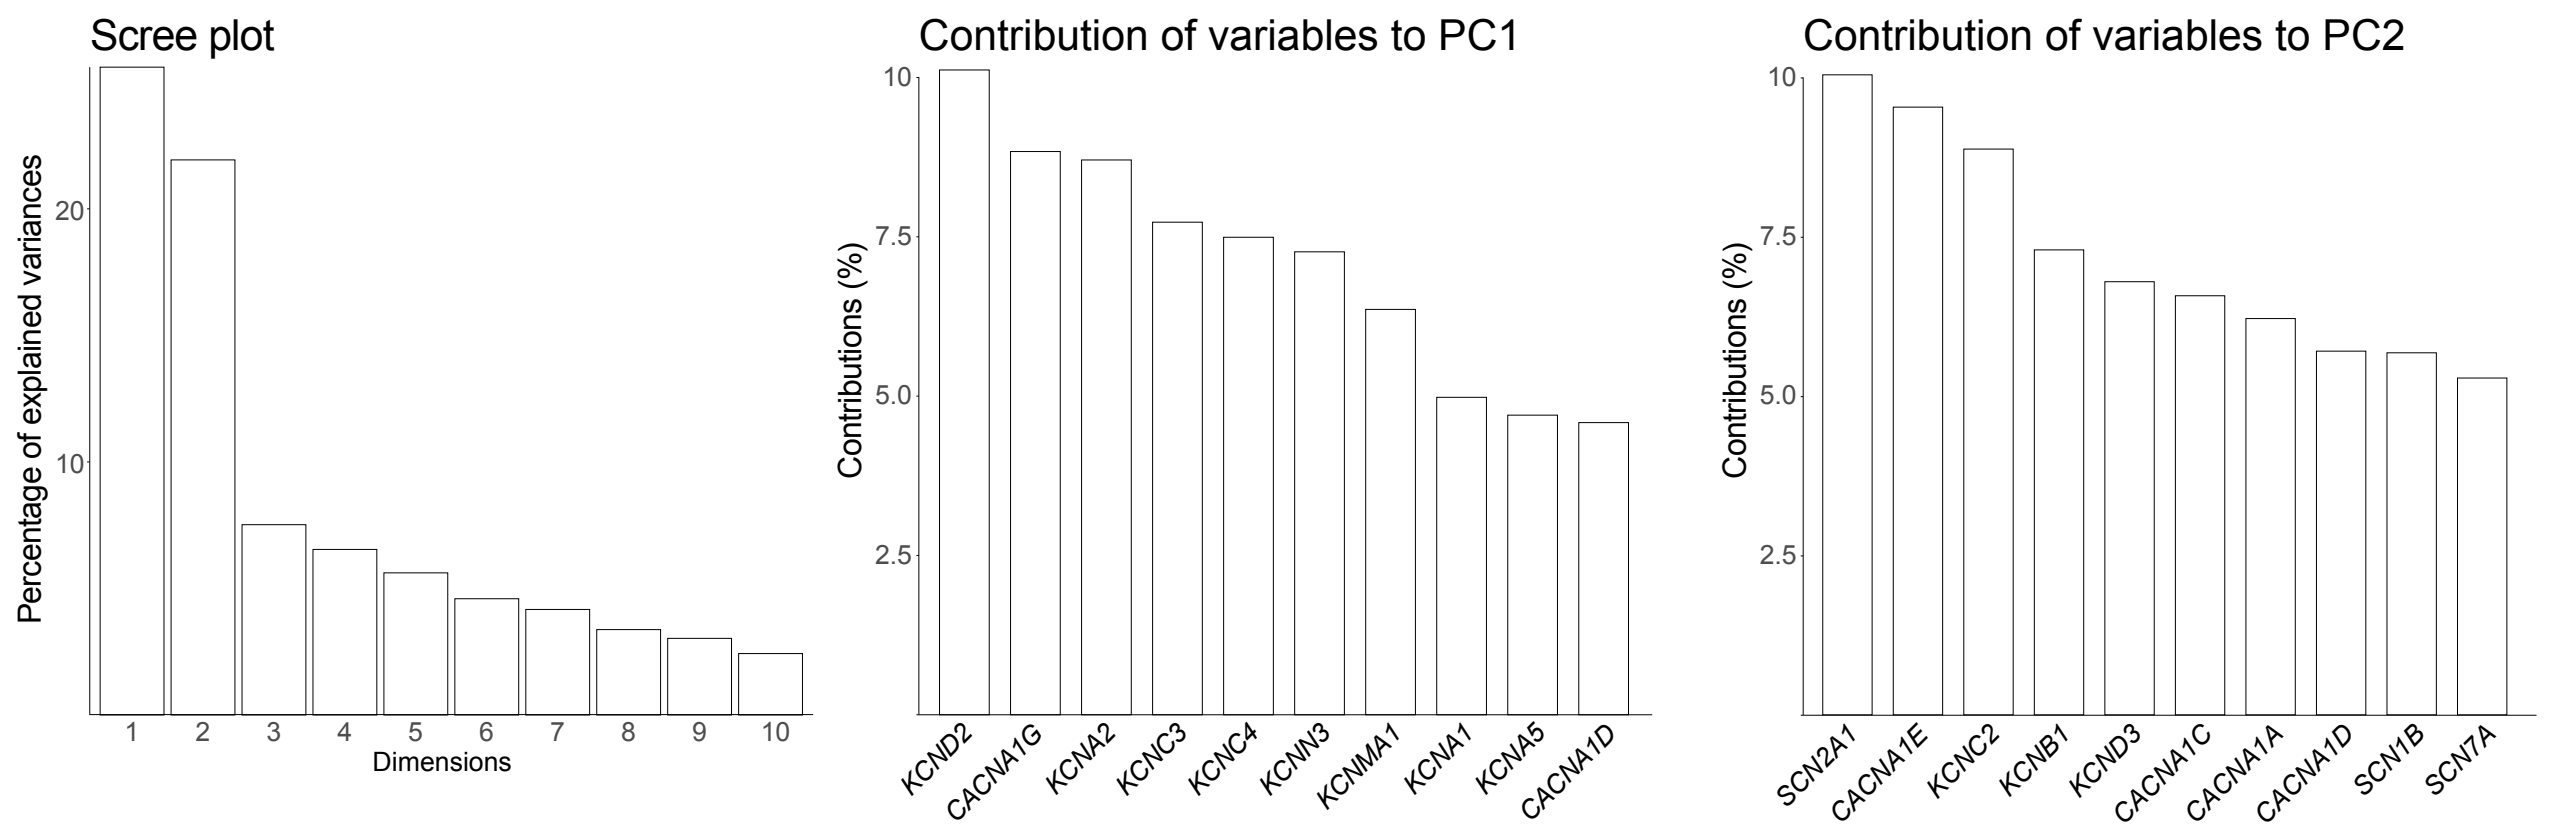

Source: http://biorxiv.org/content/10.1101/360826v1.full.pdf
